# Supplementary material for: Genome-scale mutational signatures of aflatoxin in cells, mice, and human tumors
Source: PubMed Central journal article supplement — Genome Res. 2017 Sep;27(9):1475–86. doi: 10.1101/gr.220038.116 (PMC5580708; doi:10.1101/gr.220038.116), 2017-09
Supplement: supp_gr.220038.116_Supplemental_Figs_S1_to_S29.pdf [file supp_gr.220038.116_Supplemental_Figs_S1_to_S29.pdf]

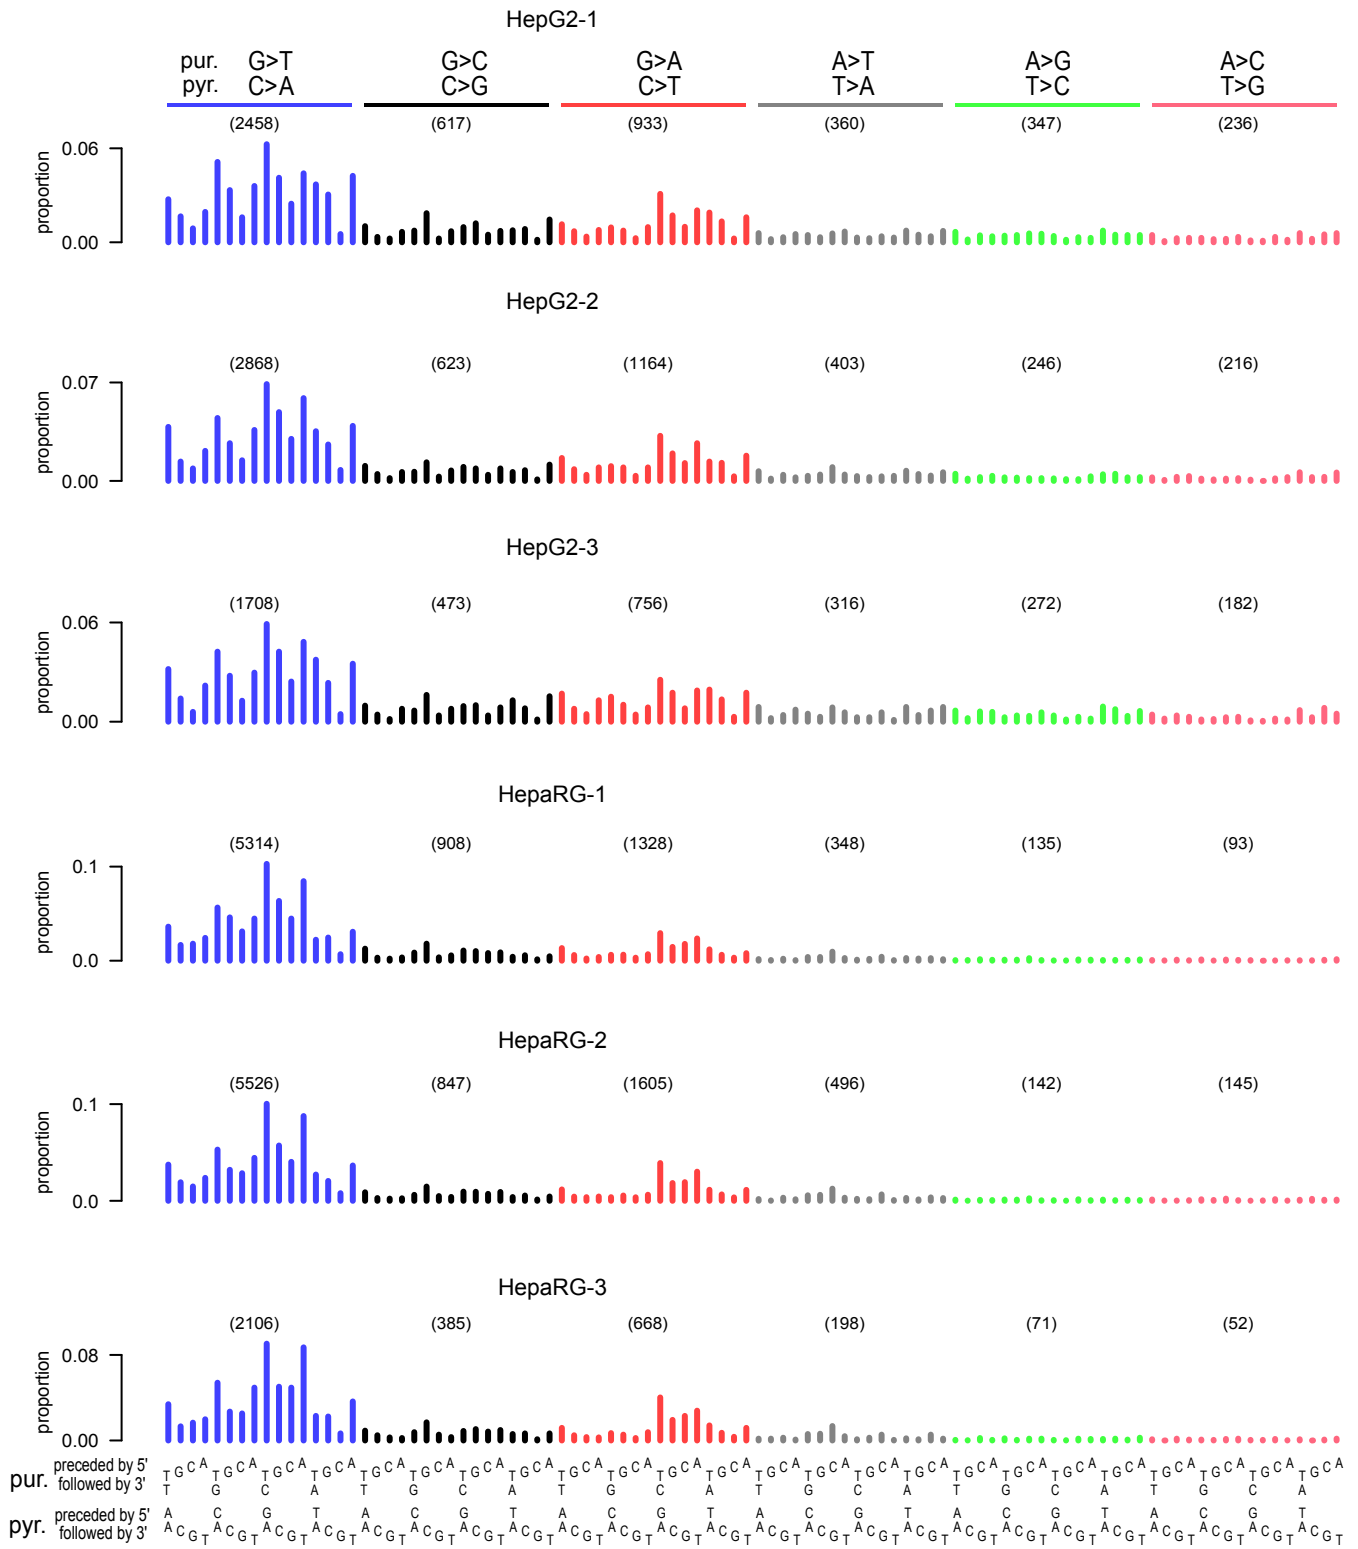

**Supplemental Fig. S1** Mutation spectra of human cell lines treated with AFB1

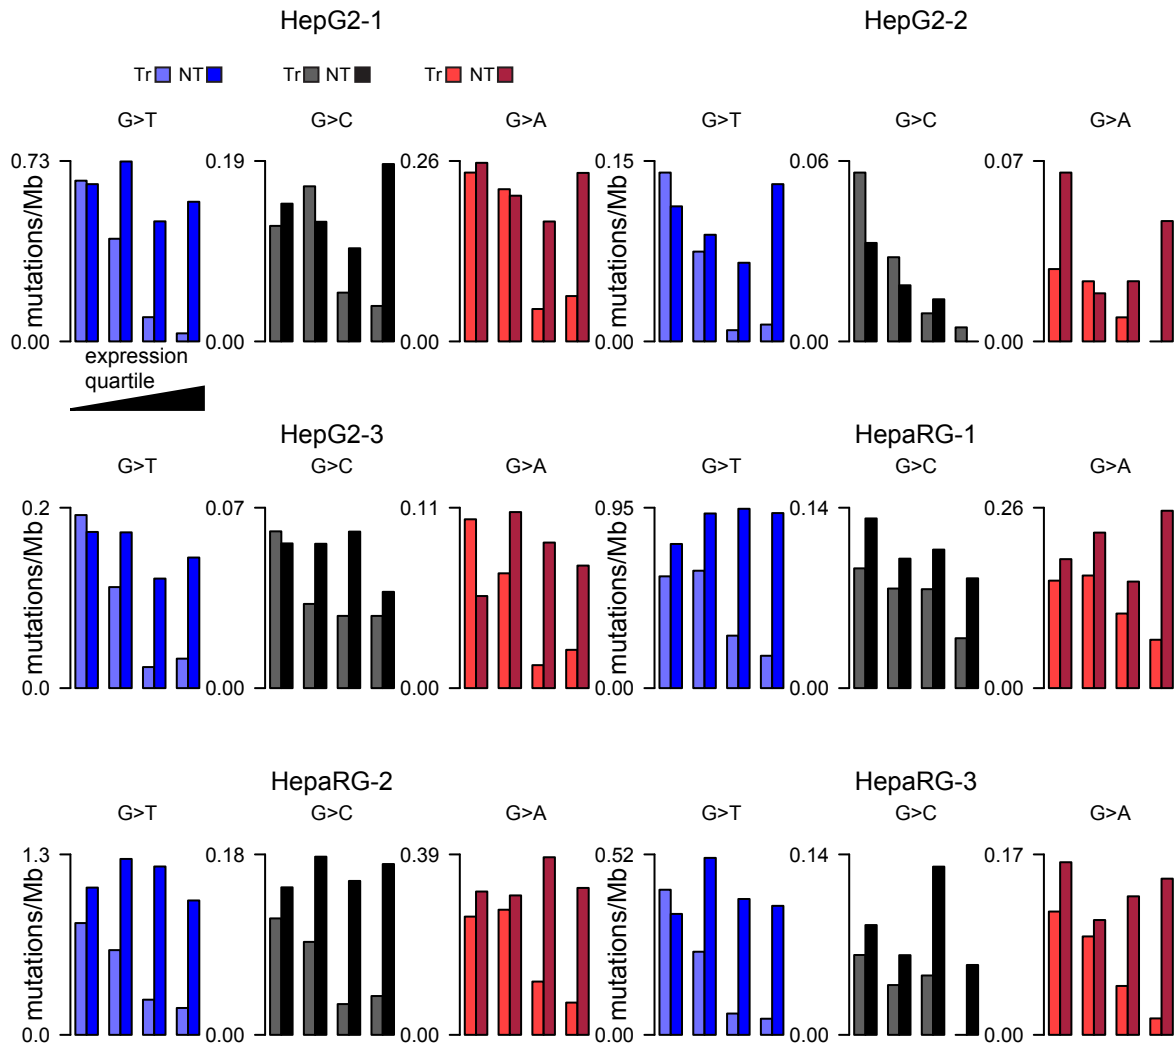

**Supplemental Fig. S2** Transcription strand bias by expression quartile for human cell lines treated with AFB1

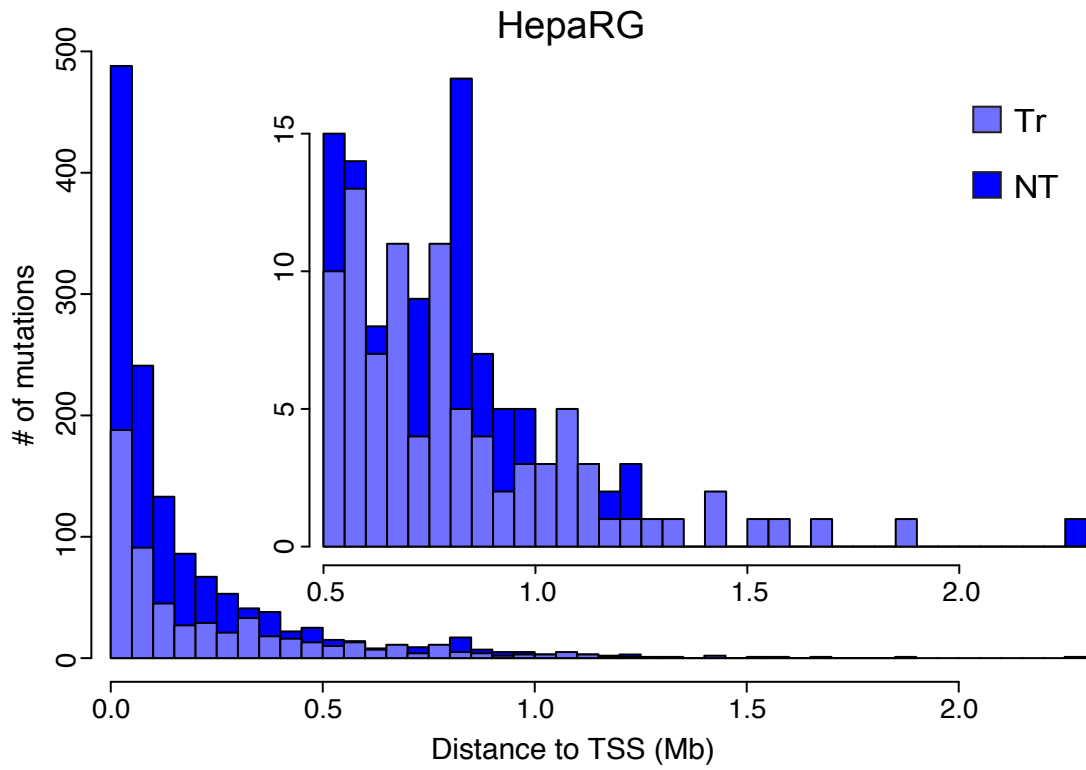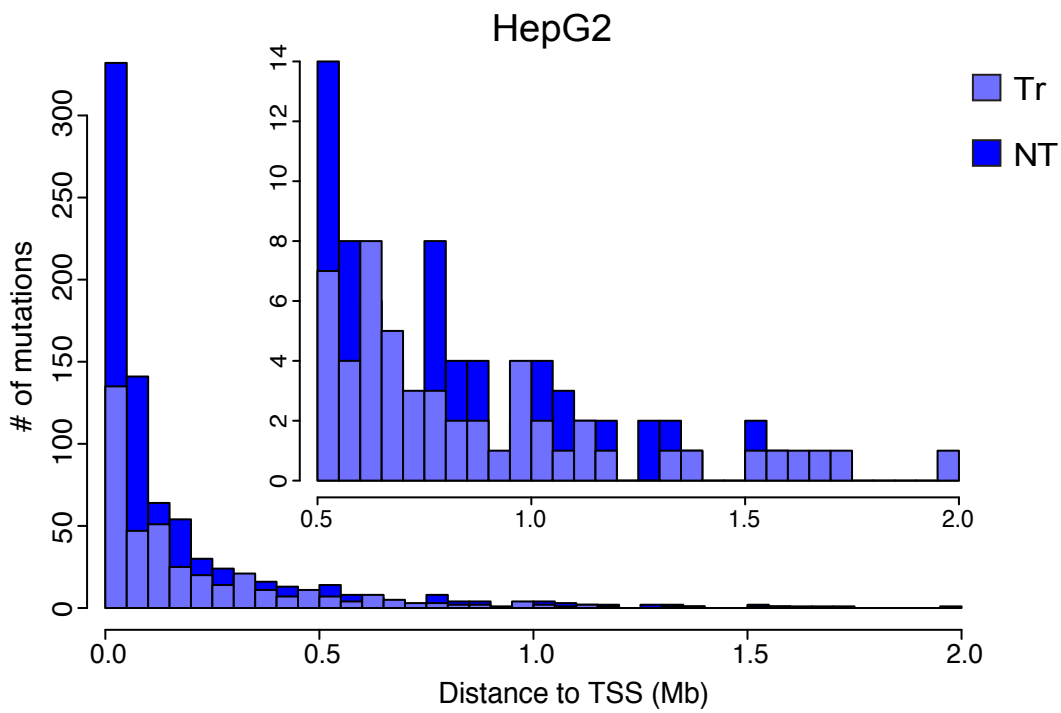

**Supplemental Fig. S3** Transcription strand bias along the transcripts for human cell lines treated with AFB1.



**A****M1**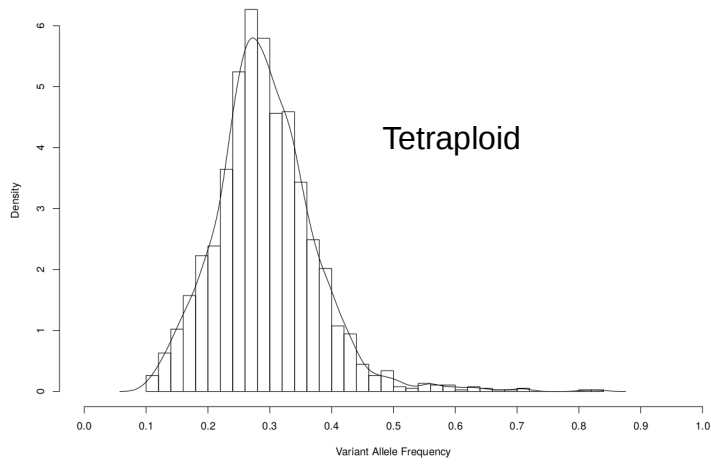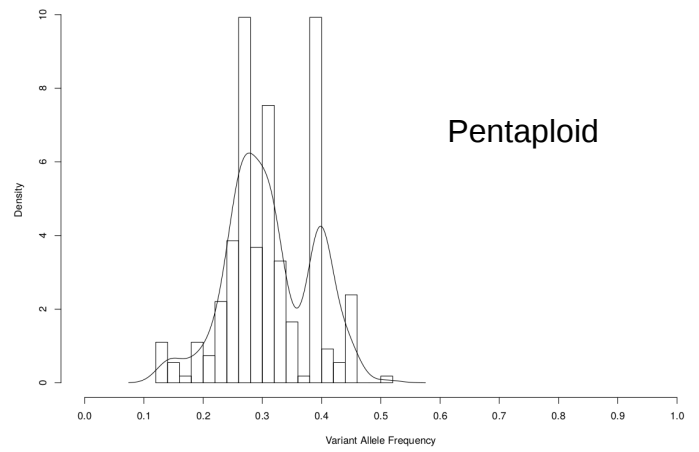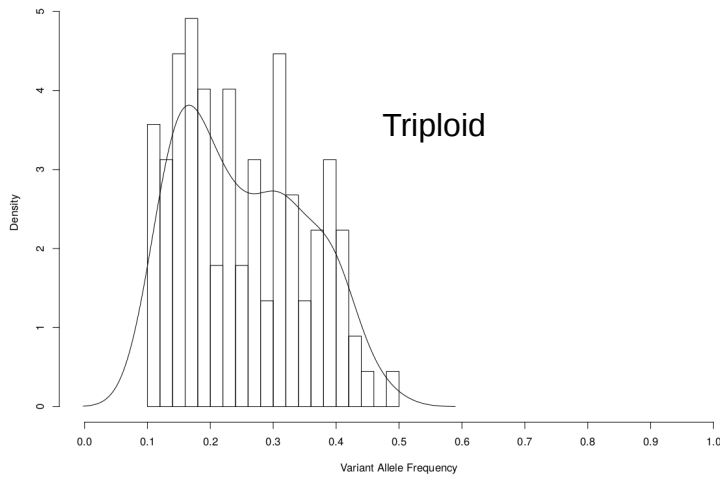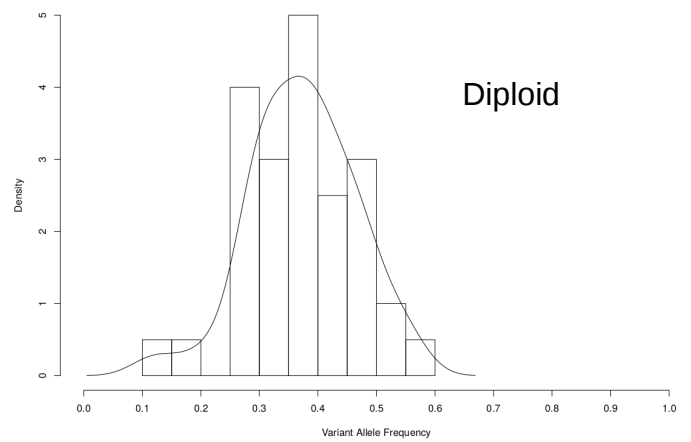**B**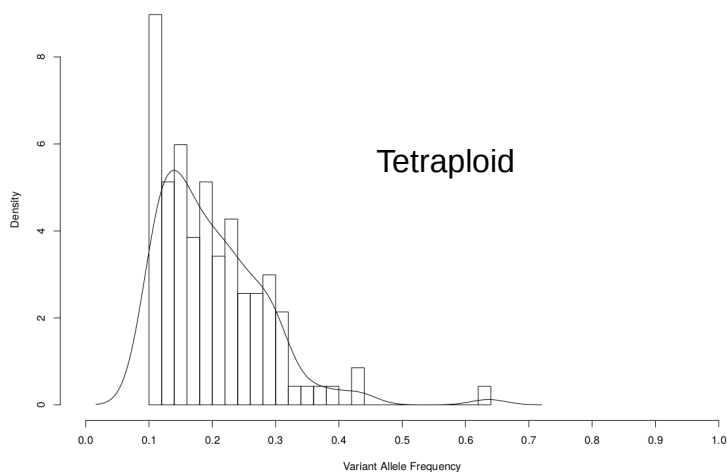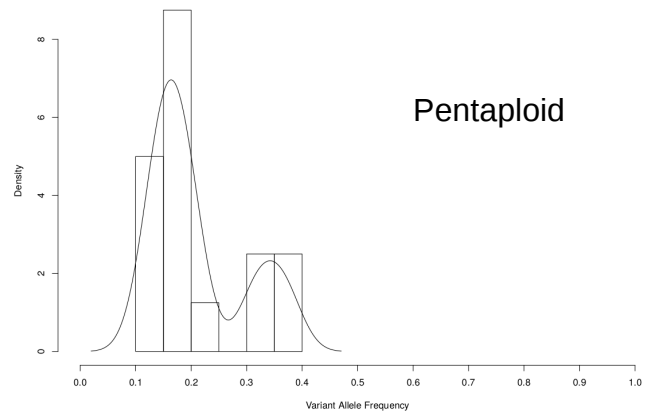

Triploid region only contains five somatic mutations with VAF of 0.316, 0.291, 0.233, 0.178 and 0.154 respectively

Diploid region only contains four somatic mutations with VAF of 0.212, 0.194, 0.156 and 0.119 respectively

**Supplemental Fig. S5** Probability densities of G:C > T:A (**A**) and A:T > C:G (**B**) mutation counts by variant allele frequency (VAF) in different copy number regions of the genome of mouse tumor M1. Probability density histograms were created using the R function `hist()` with `probability=T`; probability density lines were estimated using the R `density()` function.



**A****M2**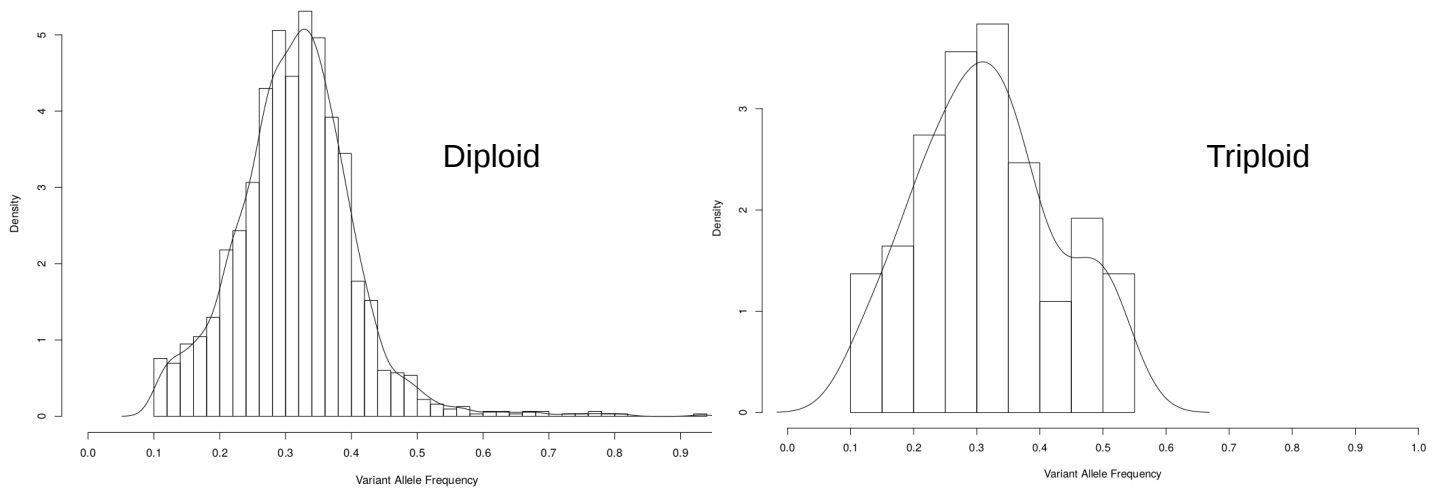**B**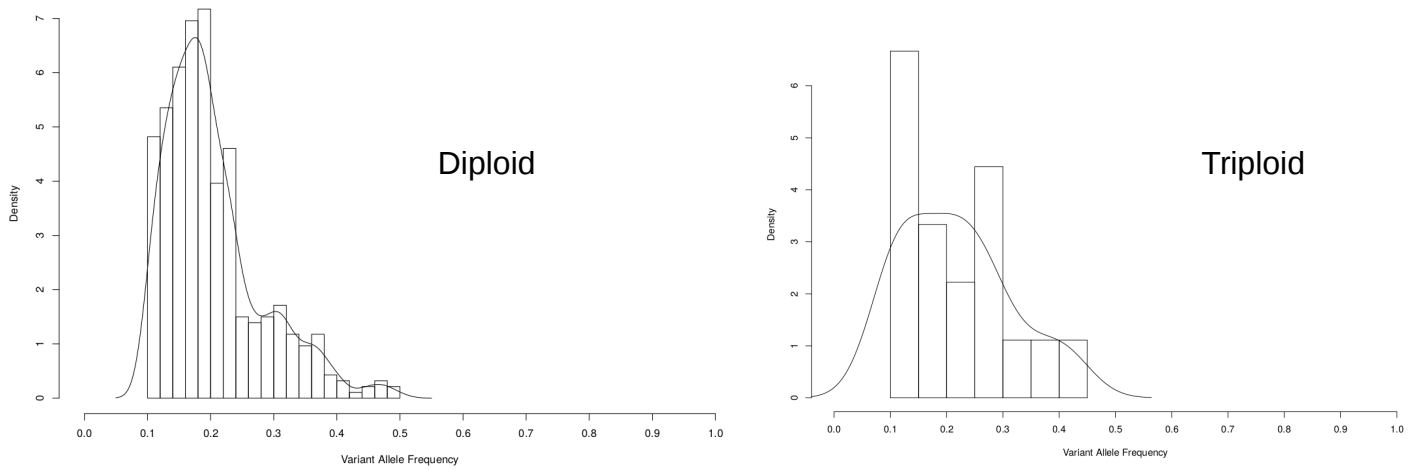

**Supplemental Fig. S7** Probability densities of G:C > T:A (**A**) and A:T > C:G (**B**) mutation counts by variant allele frequency (VAF) in different copy number regions of the genome of mouse tumor M2. Probability density histograms were created using the R function `hist()` with `probability=T`; probability density lines were estimated using the R `density()` function.





# M3

## A

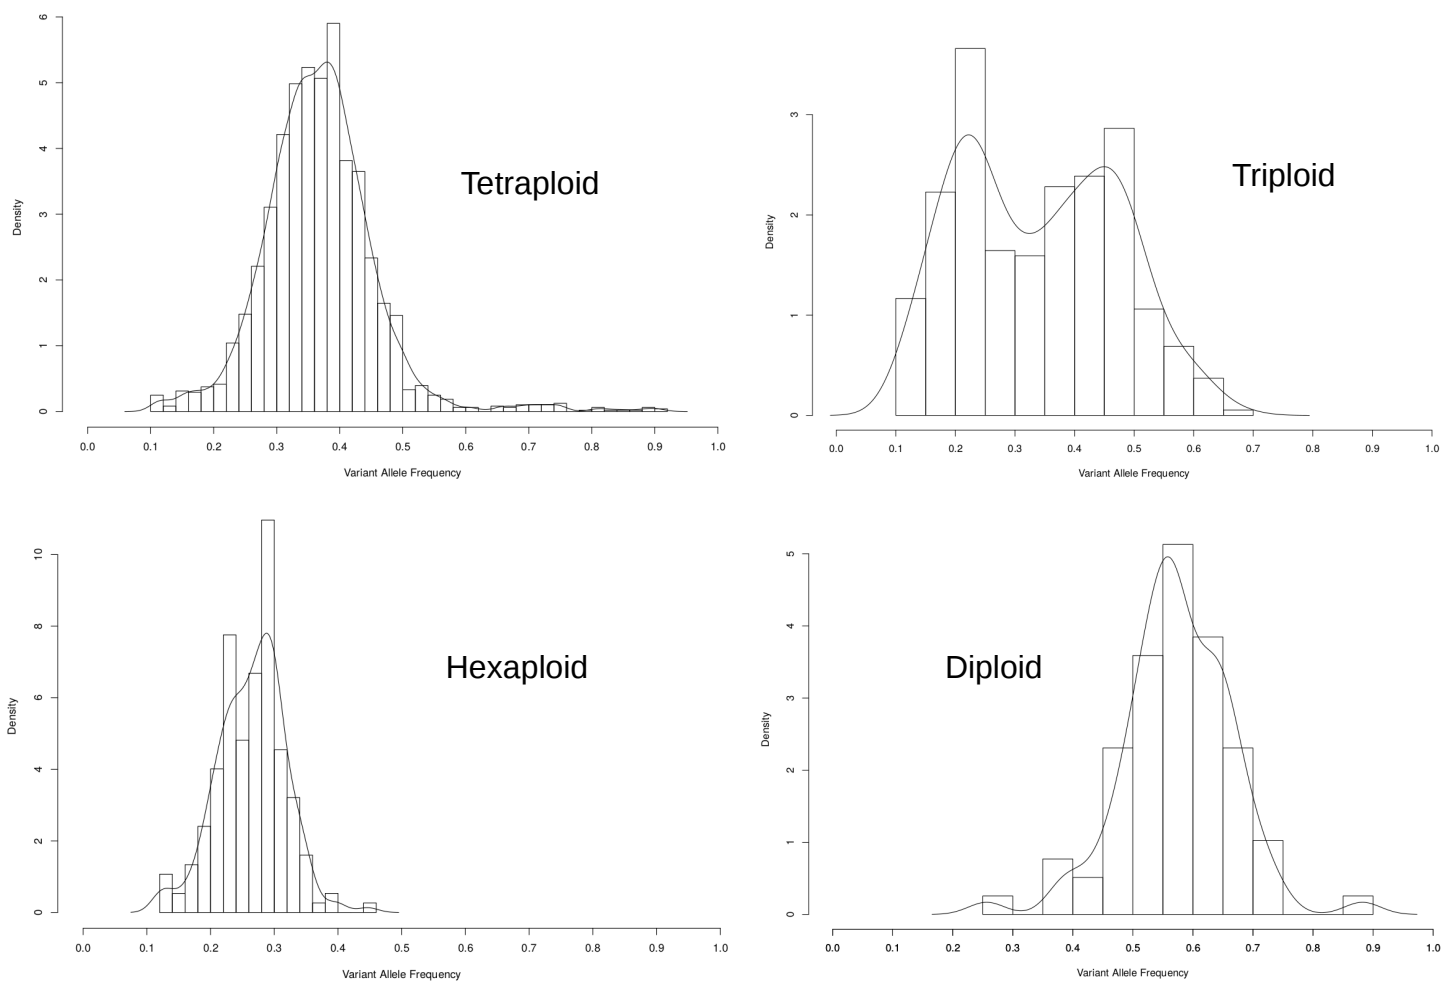

## B

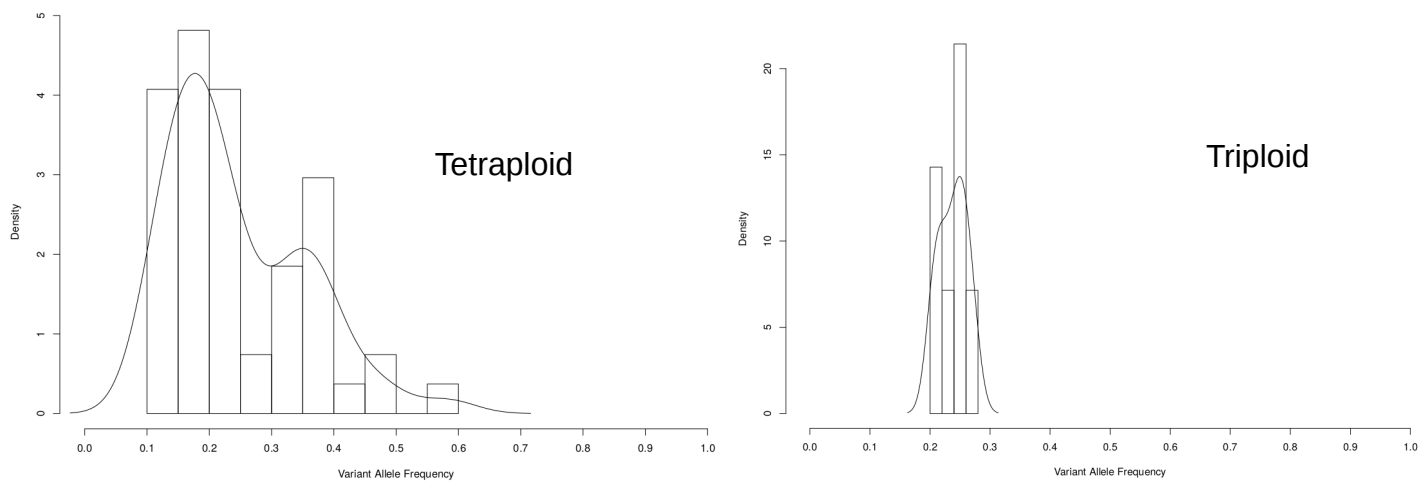

Hexaploid region only contain two somatic mutations with VAF of 0.229 and 0.107 respectively

Diploid region only contain three somatic mutations with VAF of 0.290, 0.231 and 0.52 respectively

**Supplemental Fig. S9** Probability densities of G:C > T:A (**A**) and A:T > C:G (**B**) mutation counts by variant allele frequency (VAF) in different copy number regions of the genome of mouse tumor M3. Probability density histograms at were created using the R function hist() with probability=T; probability density lines were estimated using the R density() function.



# M4

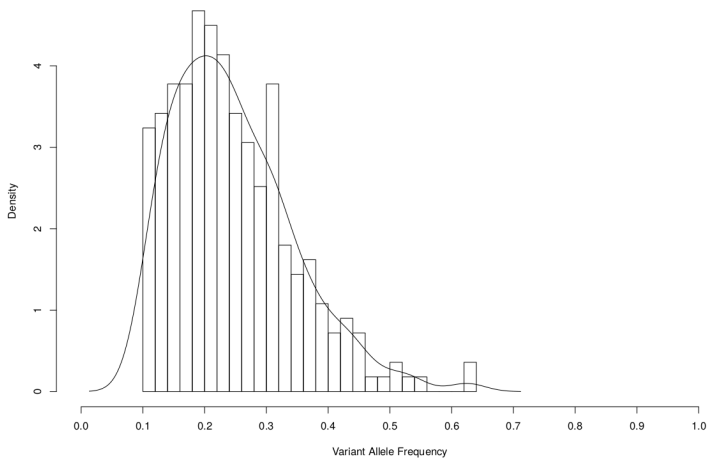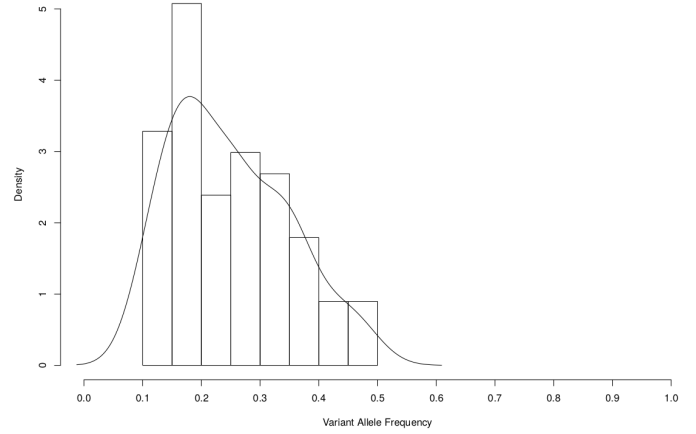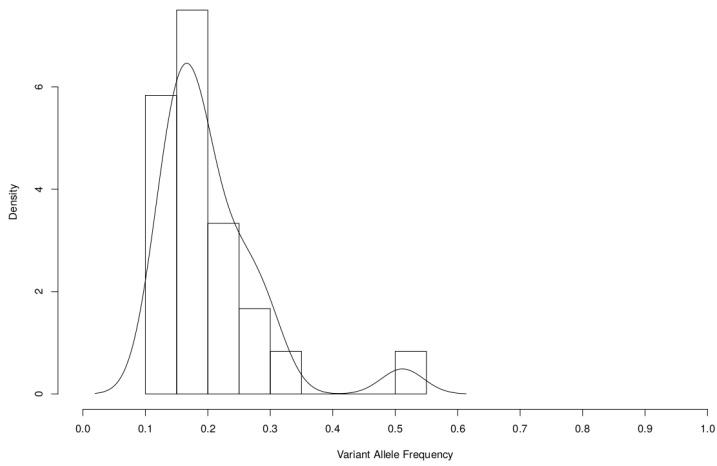

**Supplemental Fig. S11** Probability densities of G:C > T:A mutation counts by variant allele frequency (VAF) in different copy number regions of the genome of mouse tumor M4. Probability density histograms were created using the R function `hist()` with `probability=T`; probability density lines were estimated using the R `density()` function.



# M5

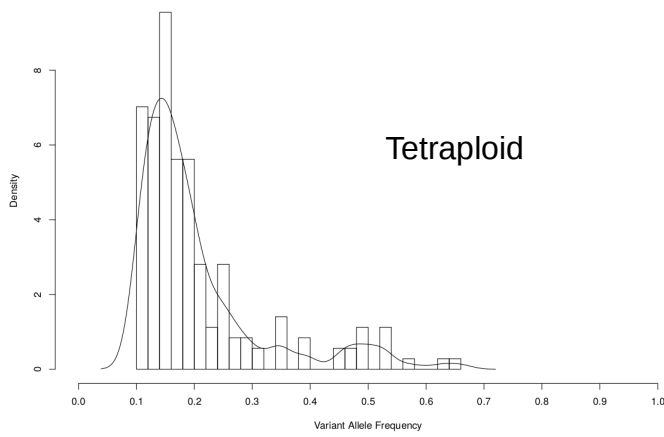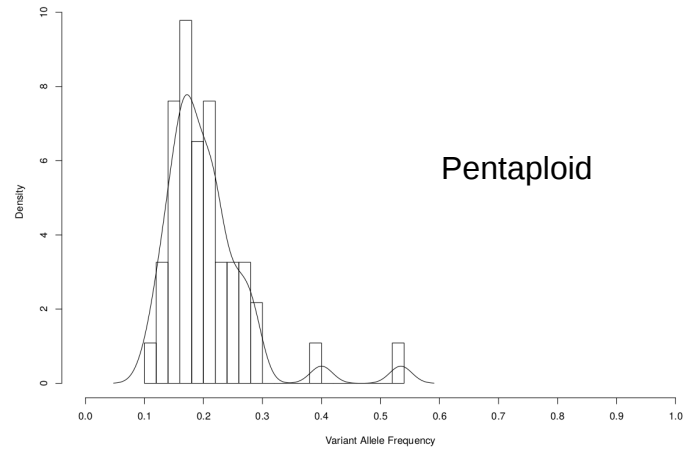

Triploid region only contain two somatic mutations with VAF of 0.150 and 0.176 respectively

**Supplemental Fig. S13** Probability densities of G:C > T:A mutation counts by variant allele frequency (VAF) in different copy number regions of the genome of mouse tumor M5. Probability density histograms at were created using the R function hist() with probability=T; probability density lines were estimated using the R density() function.



# M6

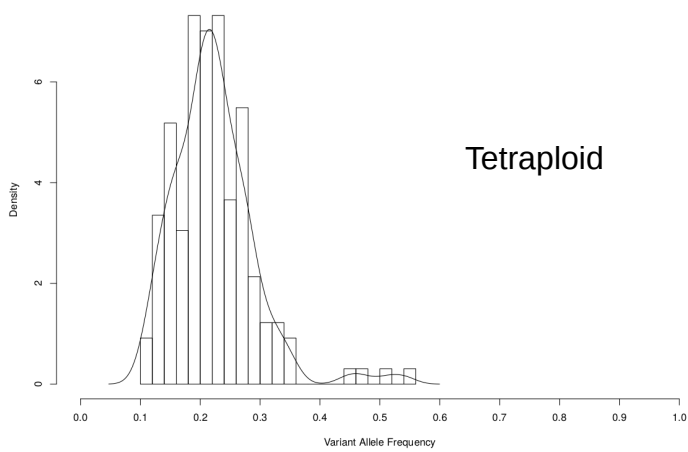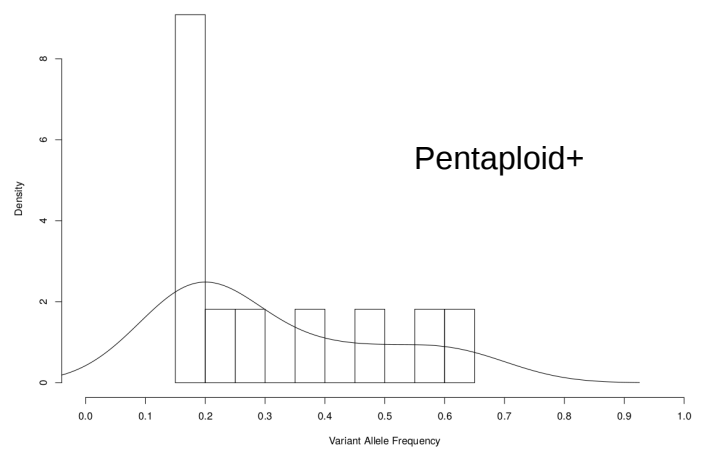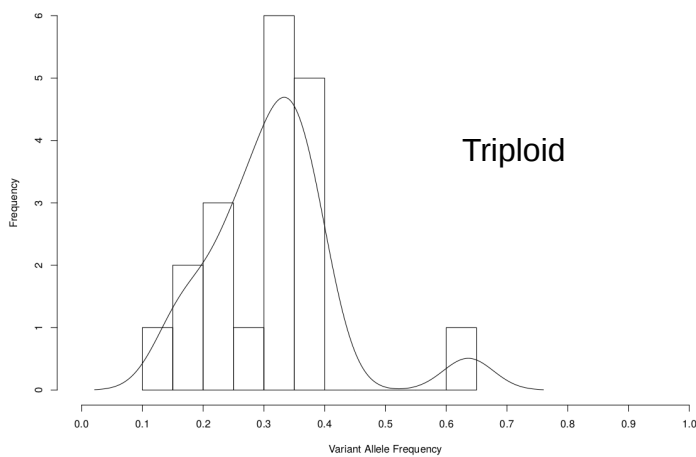

**Supplemental Fig. S15** Probability densities of G:C > T:A mutation counts by variant allele frequency (VAF) in different copy number regions of the genome of mouse tumor M6. Probability density histograms were created using the R function `hist()` with `probability=T`; probability density lines were estimated using the R `density()` function

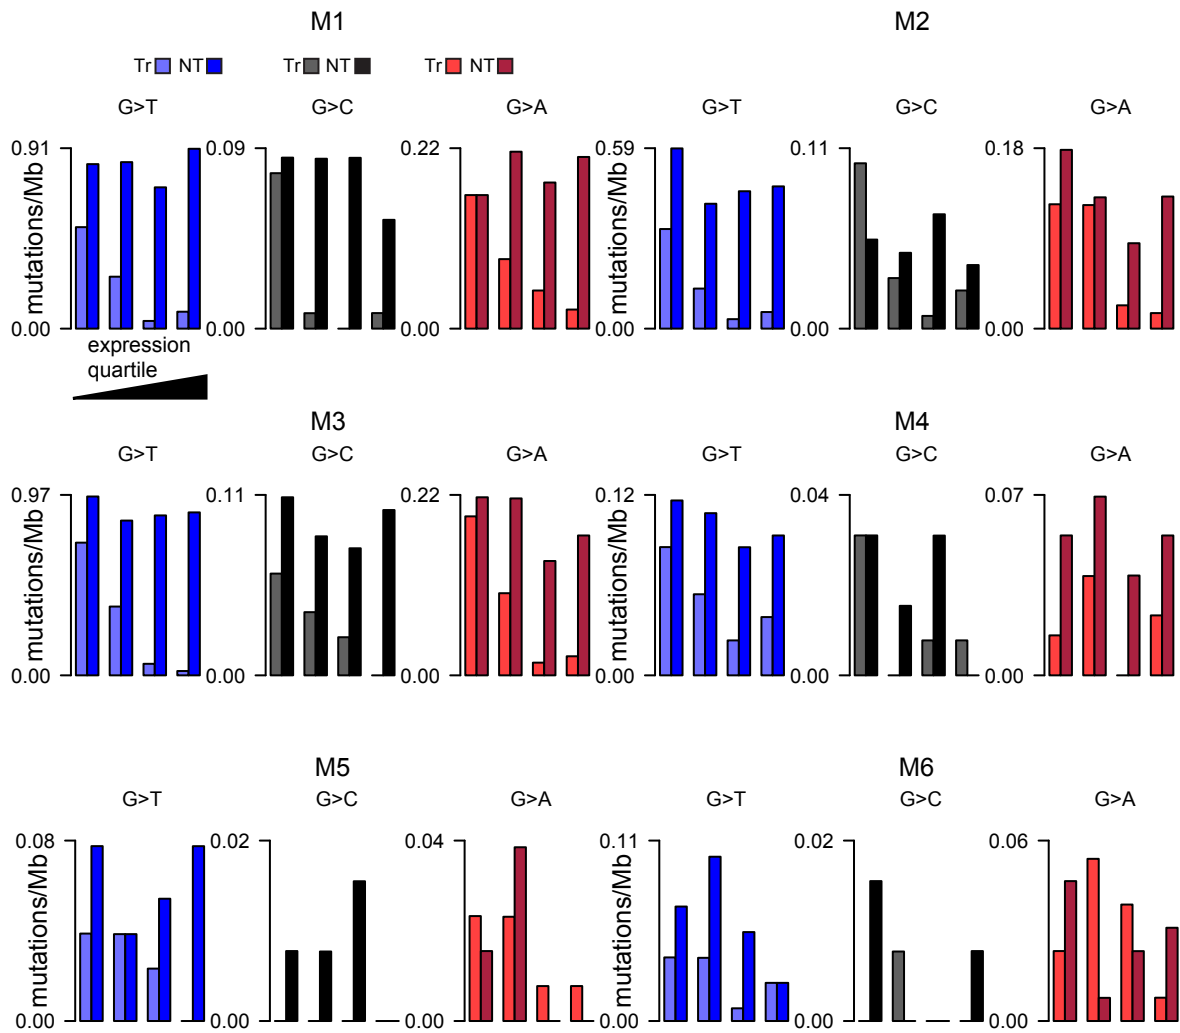

**Supplemental Fig. S16** Transcription strand bias by expression quartile for liver tumors from mice treated with AFB1



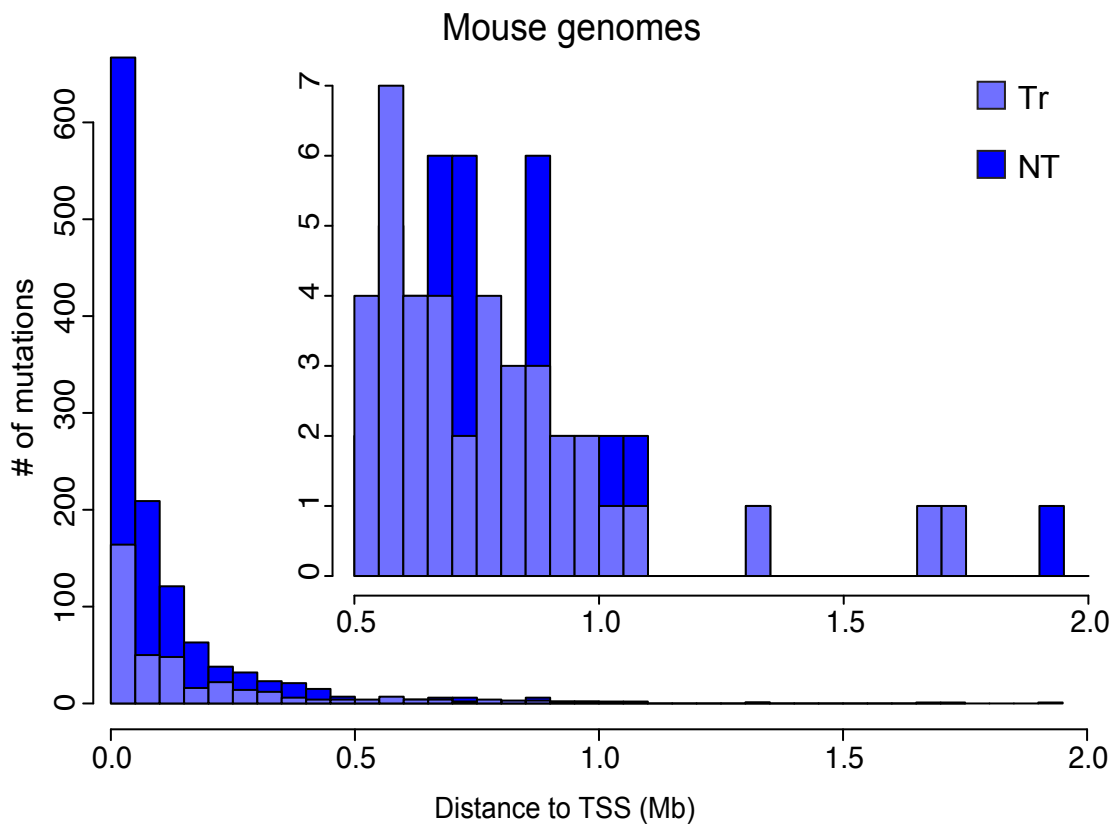

**Supplemental Fig. S17** Transcription strand bias along the transcripts for liver tumors from mice treated with AFB1



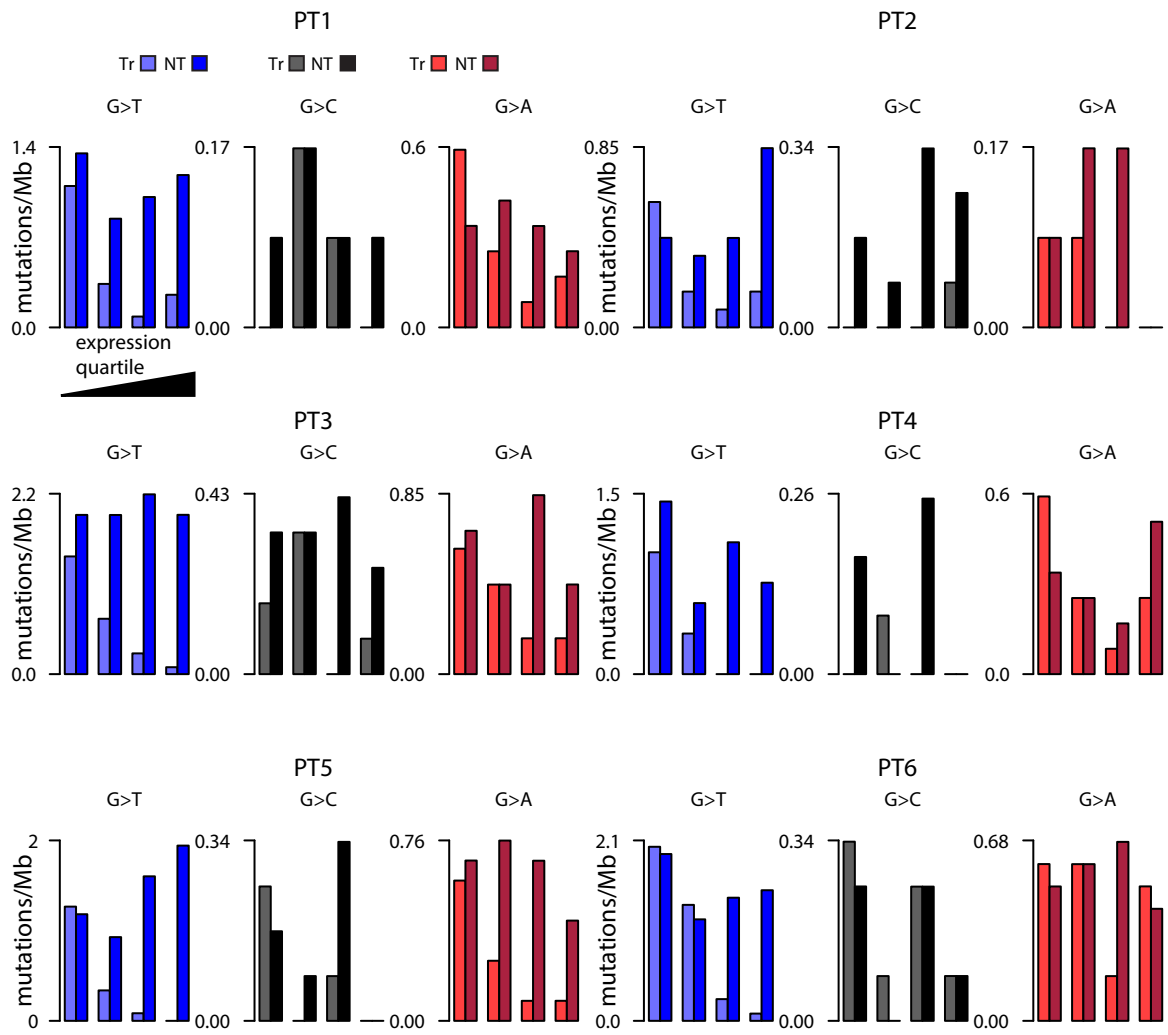

**Supplemental Fig. S19** Transcription strand bias by expression quartile for Qidong HCCs

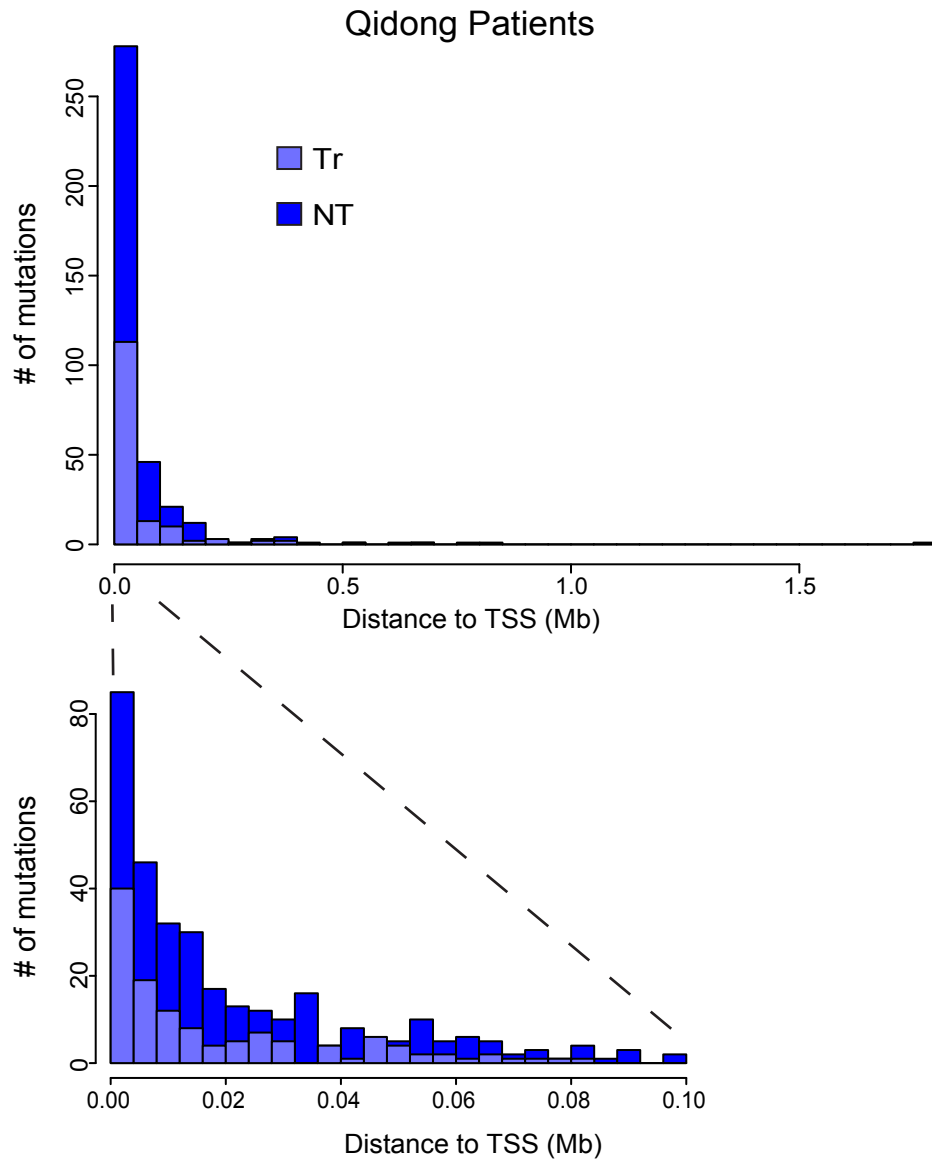

**Supplemental Fig. S20** For the Qidong HCCs, the number of mutations is too low to assess whether transcription strand bias declines from the 5' to 3' end of transcripts.



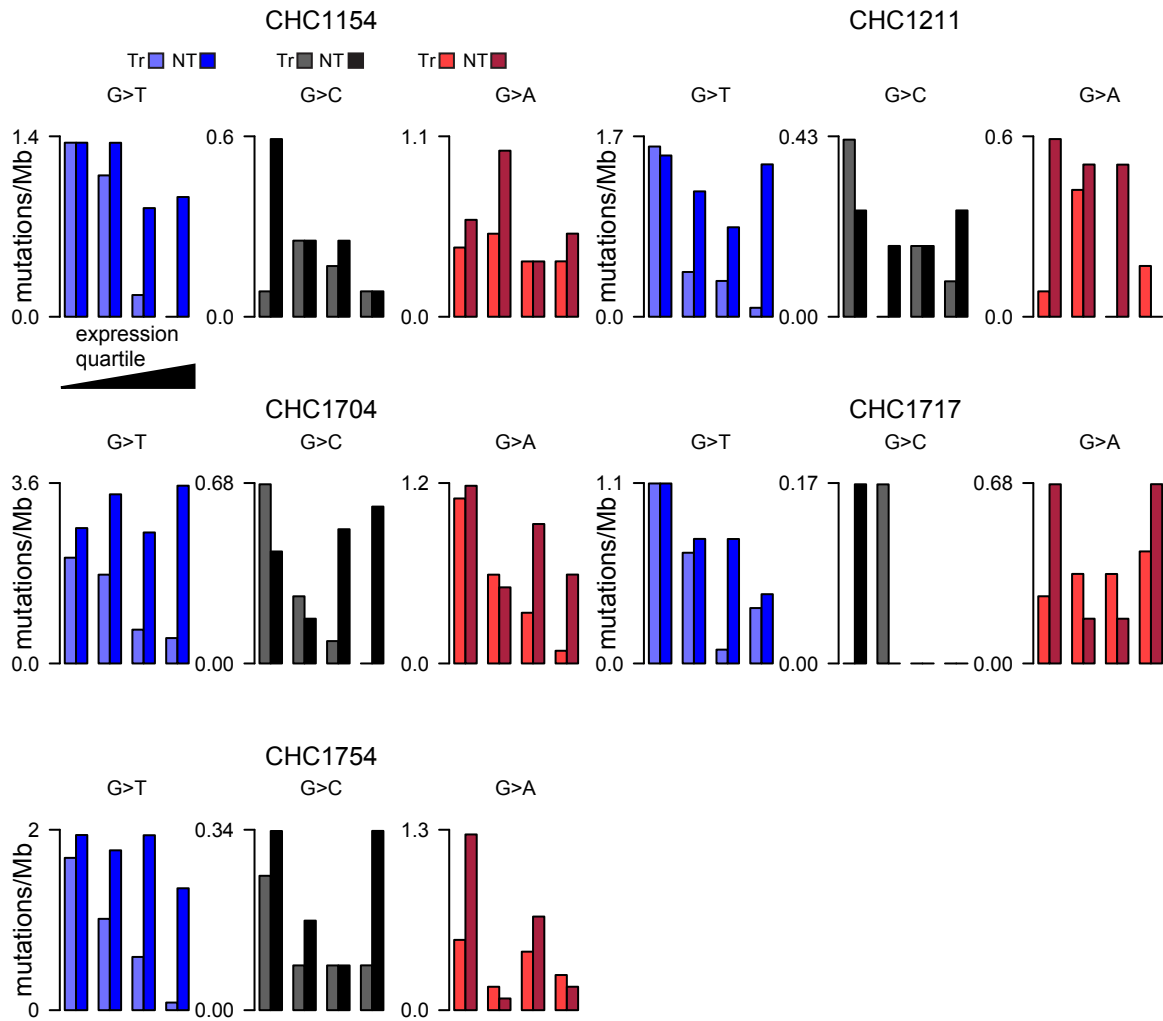

**Supplemental Fig. S22** Transcription strand bias by expression quartile for 5 HCCs from recent African immigrants reported in Schulze et al., 2015.

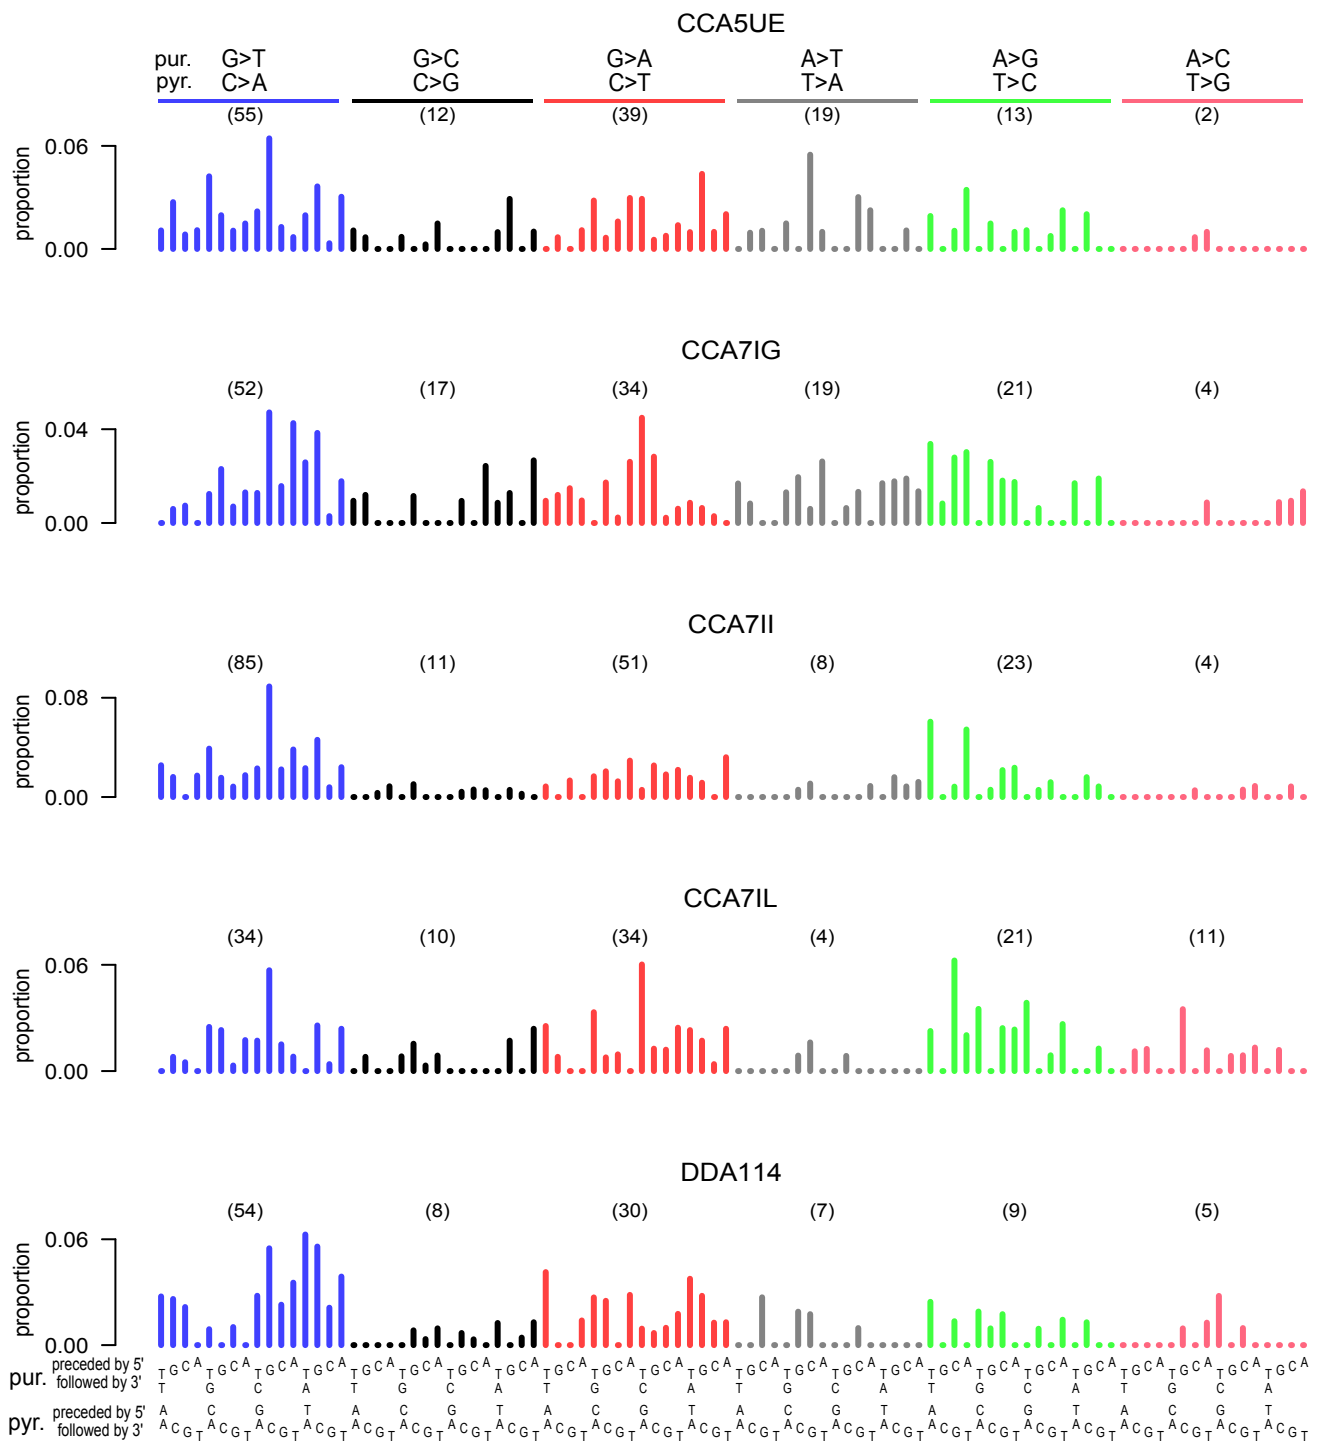

**Supplemental Fig. S23** Mutation spectra for TCGA whole exome data reported in Schulze et al., 2015 as likely reflecting aflatoxin exposure.

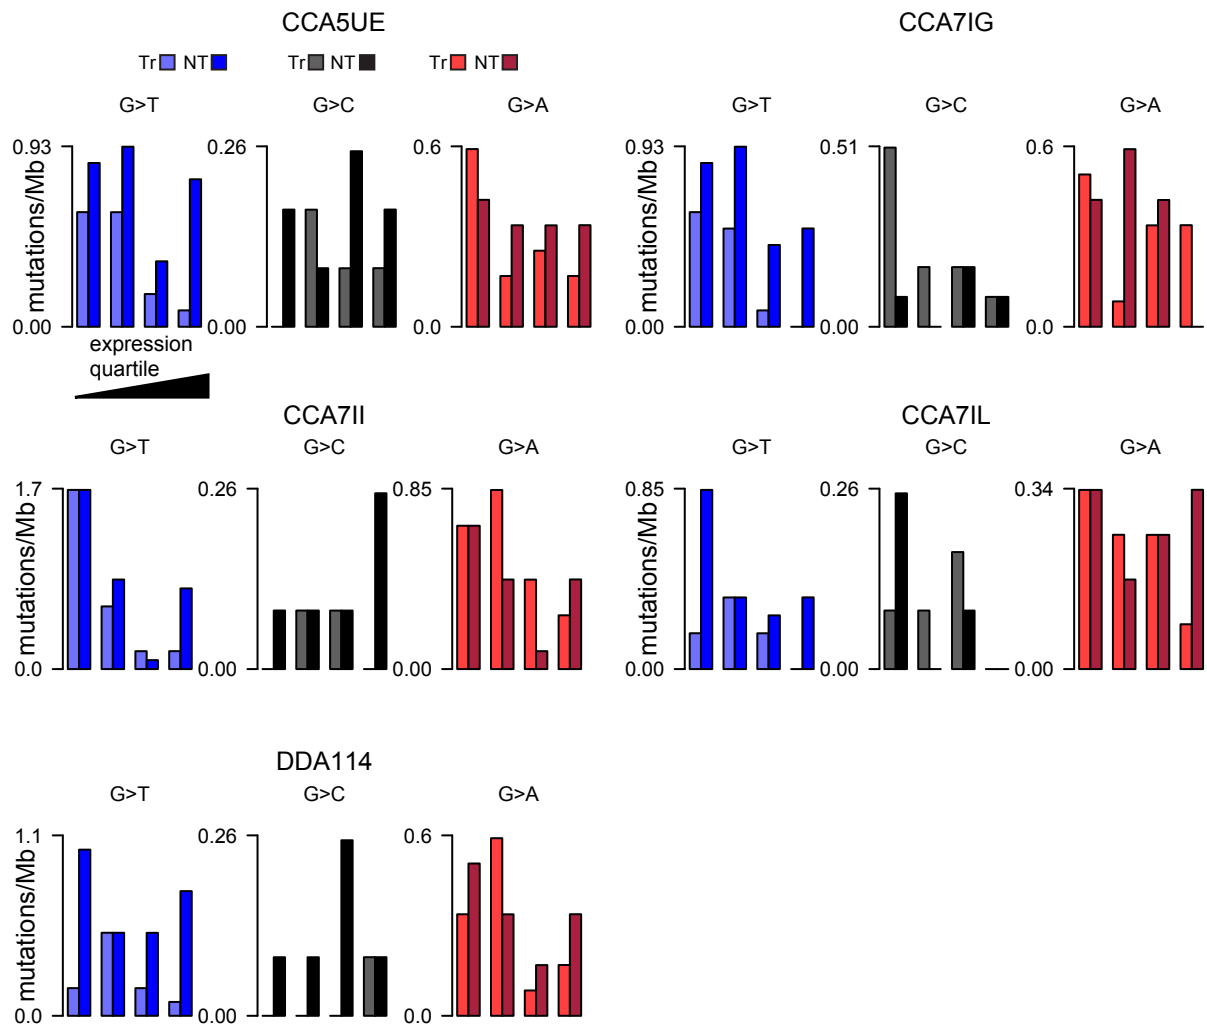

**Supplemental Fig. S24** Transcription strand bias by expression quartile for TCGA WESdata reported as likely reflecting aflatoxin exposure in Schulze et al., 2015.



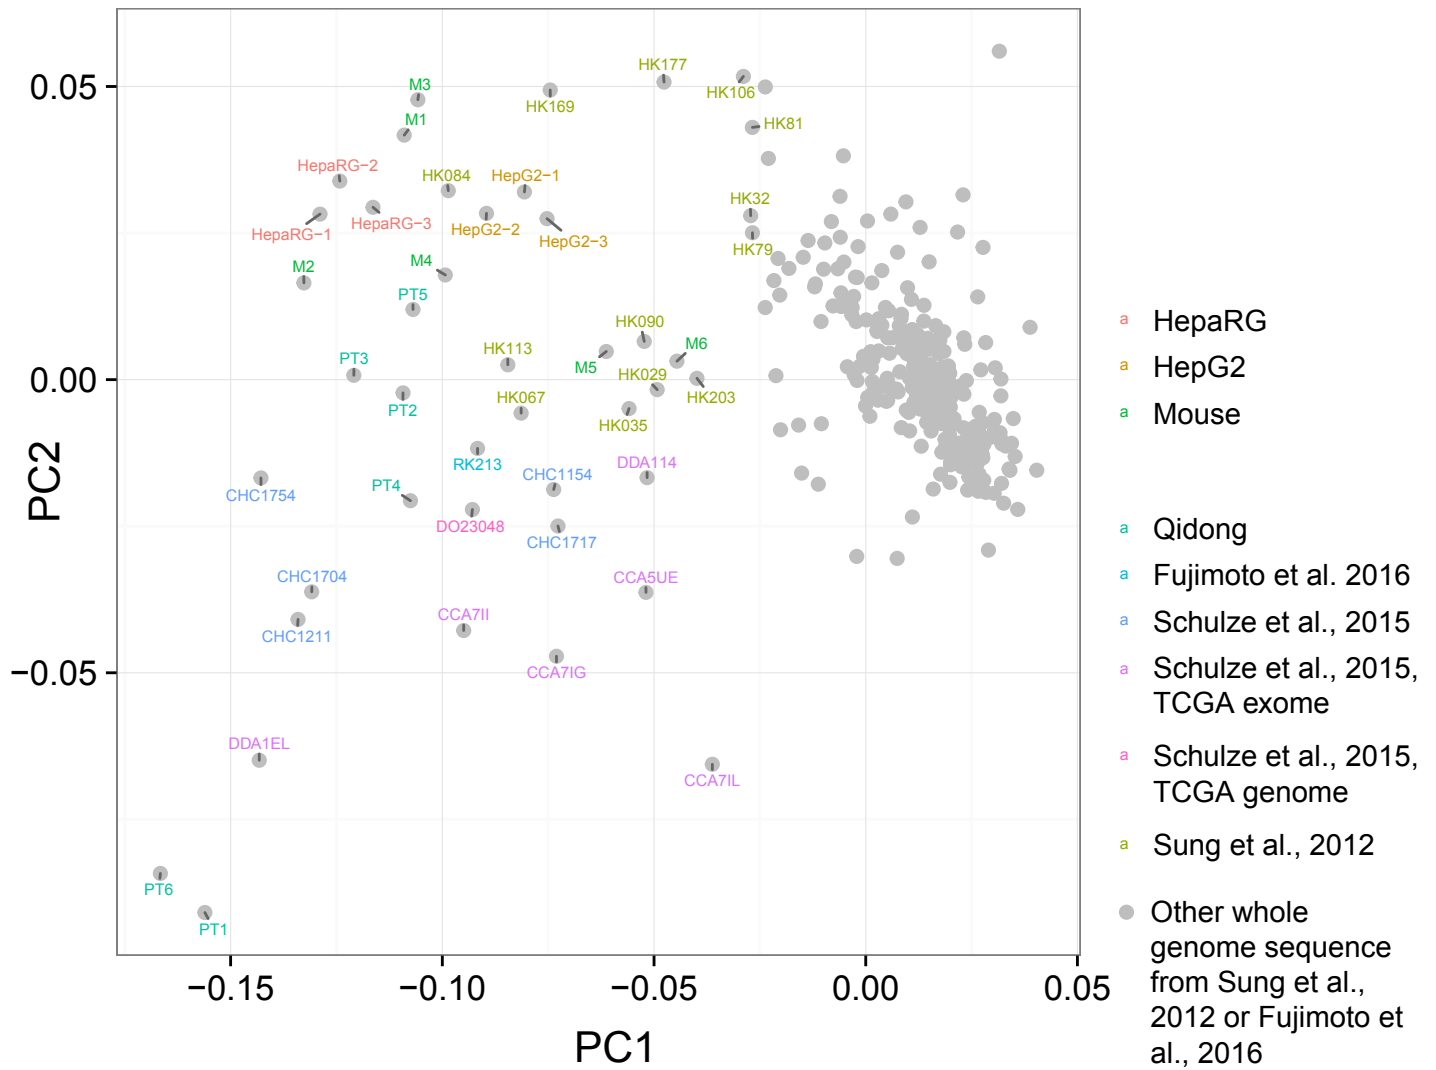

**Supplemental Fig. S25** Principal components analysis on proportions of G > N mutations in trinucleotide context in AFB1 treated cell lines, tumors from AFB1-treated mice, whole-genome-sequenced human HCCs, and selected whole-exome-sequenced human HCCs.





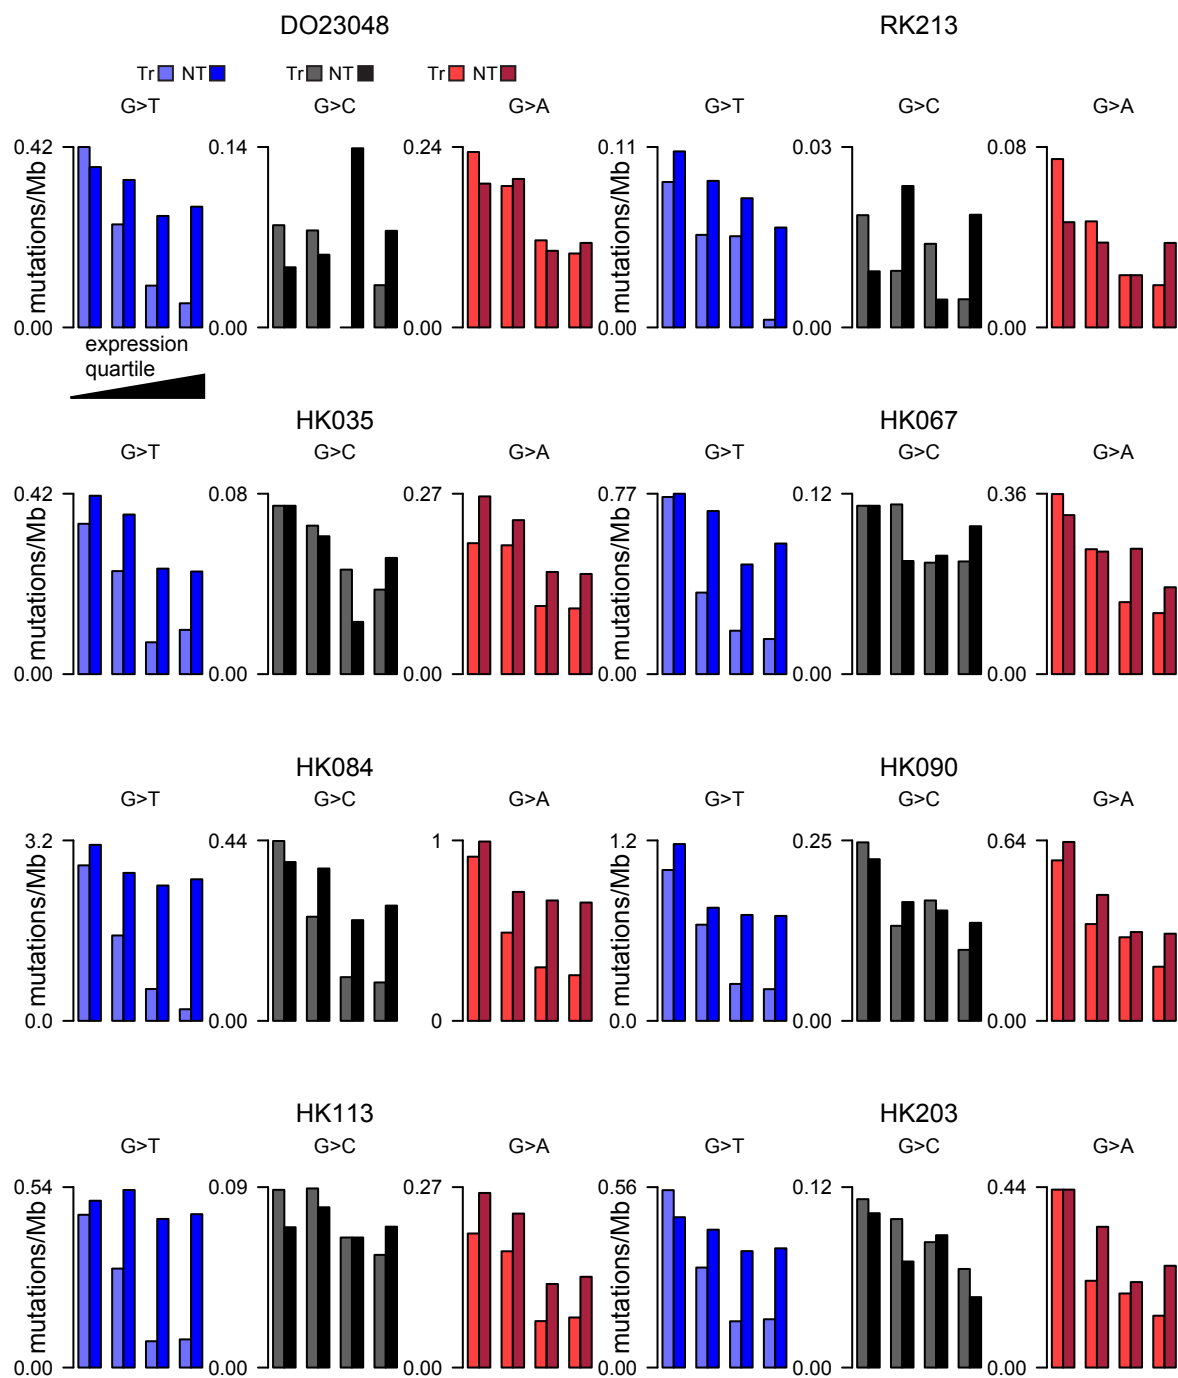

**Supplemental Fig. S28** Transcription strand bias by expression quartile for whole genome somatic mutations likely reflecting aflatoxin exposure in human HCCs.

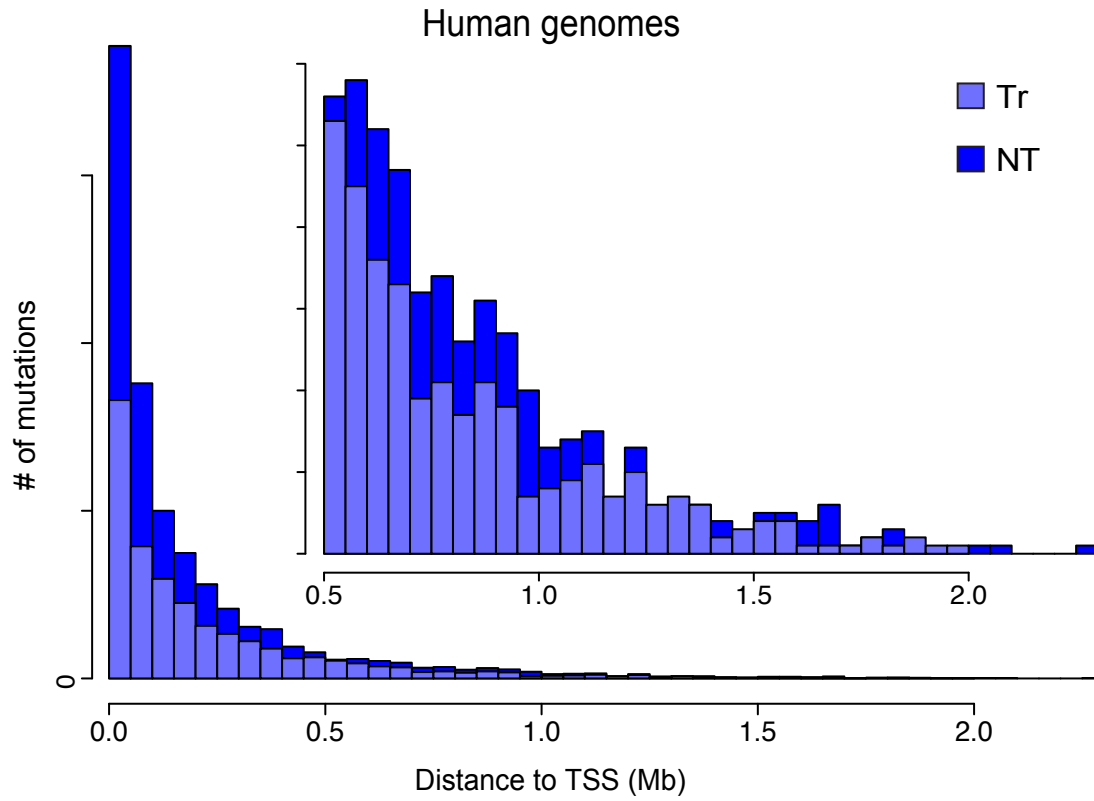

**Supplemental Fig. S29** Transcription strand bias along the transcripts for likely aflatoxin exposed human genomes..
