# Supplementary material for: Genome-scale mutational signatures of aflatoxin in cells, mice, and human tumors
Source: HighWire-hosted journal article supplement (doi:10.1101/gr.220038.116), 2017-07-24
Supplement: Supplemental_Tables_S1_to_S13.xlsx [file Supplemental_Tables_S1_to_S13.xlsx]

## Sheet: Supplemental_Table_S1
Supplemental Table S1 Details of sequencing.
Sample	Type	Read length (bp)	Number of reads (R1 + R2)	Mean coverage	Sequencer	Exome Capture Kit
HepaRG-1	Cell line	150	906570652	30.48	HiSeq X Ten	NA (WGS)
HepaRG-2	Cell line	150	931667100	31.76	HiSeq X Ten
HepaRG-3	Cell line	150	917866122	30.76	HiSeq X Ten
HepaG2-1	Cell line	150	844984780	28.32	HiSeq X Ten
HepaG2-2	Cell line	150	916966980	30.96	HiSeq X Ten
HepaG2-3	Cell line	150	875724856	29.87	HiSeq X Ten
M1	Tumor	150	1056388650	46.18	HiSeq 4000	NA (WGS)
	Normal	150	1132938480	38.1	HiSeq 4000
M2	Tumor	150	1004133928	40.44	HiSeq 4000
	Normal	150	1058324426	40.82	HiSeq 4000
M3	Tumor	90	1713446774	44.72	HiSeq 4000
	Normal	150	1053159382	42.21	HiSeq 4000
PT1	Tumor	51	58668548	22.07	HiSeq 2500	NimbleGen SeqCap EZ Exome v3
	Normal	51	57355788	21.41	HiSeq 2500
PT2	Tumor	51	55516846	20.7	HiSeq 2500
	Normal	51	52456232	19.42	HiSeq 2500
PT3	Tumor	51	128638836	48.04	HiSeq 2500
	Normal	51	156534408	59.78	HiSeq 2500
PT4	Tumor	51	104879884	37.7	HiSeq 2500
	Normal	51	118215830	45.59	HiSeq 2500
PT5	Tumor	101*	105133454	59.22	HiSeq 2500
	Normal	101*	113171428	61.52	HiSeq 2500
PT6	Tumor	101*	110245694	60.72	HiSeq 2500
	Normal	101*	94858868	53.39	HiSeq 2500
* Because of the short fragment sizes in FFPE-derivied libraries and the relatively long read length, we had to remove adapter sequence using the Fastx_clipper command of the FASTX_toolkit (https://hannonlab.cshl.edu/fastx_toolkit/index.html). After adapter removal, orphaned single-end reads were moved to a separate file using pe-sync (https://github.com/LeviDettwyler/pe-tools) prior to alignment.
Sample		Read1 adapter sequence
PT5	Tumor	GATCGGAAGAGCACACGTCTGAACTCCAGTCACAGCAGGAAATCTCGTATGCCGTCTTCTGCTTG
	Normal	GATCGGAAGAGCACACGTCTGAACTCCAGTCACAGATCGCAATCTCGTATGCCGTCTTCTGCTTG
PT6	Tumor	GATCGGAAGAGCACACGTCTGAACTCCAGTCACATCCTGTAATCTCGTATGCCGTCTTCTGCTTG
	Normal	GATCGGAAGAGCACACGTCTGAACTCCAGTCACAGTCACTAATCTCGTATGCCGTCTTCTGCTTG
		Read2 adapter sequence
PT5 and PT6	Tumor and Normal	AGATCGGAAGAGCGTCGTGTAGGGAAAGAGTGTAGATCTCGGTGGTCGCCGTATCATT

## Sheet: Supplemental_Table_S2
Supplemental Table S2 Pearson correlation coefficients among G > N mutations in trinucleotide context in experimental systems and selected WGS human HCCs.
	Experimental systems											Human HCCs
	HepG2-2	HepG2-3	HepaRG-1	HepaRG-2	HepaRG-3	M1	M2	M3	M4	M5	M6	DO23048	RK213	HK035	HK067	HK084	HK090	HK113	HK203
	0.966597	0.974835	0.904644	0.911936	0.902547	0.91876	0.861706	0.917962	0.831036	0.839187	0.699586	0.794637	0.806061	0.83869	0.84674	0.915642	0.841672	0.867274	0.772072	HepG2-1
		0.979854	0.941092	0.960775	0.949738	0.931772	0.927291	0.889321	0.904073	0.834407	0.723982	0.840504	0.817567	0.833428	0.873651	0.920559	0.822261	0.886863	0.776564	HepG2-2
			0.904933	0.915848	0.901072	0.917765	0.897301	0.894844	0.872951	0.844585	0.704416	0.832358	0.82614	0.862515	0.87712	0.936126	0.864032	0.895311	0.816517	HepG2-3
				0.986496	0.975685	0.936436	0.94171	0.879558	0.902929	0.808895	0.663205	0.778375	0.760863	0.698228	0.774325	0.849703	0.66822	0.786258	0.614547	HepaRG-1
					0.990093	0.915392	0.945894	0.849991	0.920026	0.78066	0.682875	0.768667	0.742047	0.701661	0.777755	0.8425	0.677832	0.788696	0.622601	HepaRG-2
						0.898339	0.927917	0.828274	0.919534	0.772382	0.679459	0.744226	0.702917	0.681652	0.744135	0.803868	0.652317	0.760312	0.601199	HepaRG-3
							0.897063	0.968105	0.869432	0.887762	0.700987	0.785499	0.811736	0.777432	0.818015	0.921164	0.77633	0.838392	0.726843	M1
								0.805011	0.939349	0.777337	0.686424	0.844802	0.801119	0.751869	0.830815	0.866533	0.72691	0.846404	0.679593	M2
									0.790595	0.862585	0.681848	0.754039	0.813424	0.787304	0.809569	0.913191	0.793786	0.822262	0.736587	M3
										0.755331	0.760377	0.774402	0.737147	0.730363	0.777585	0.801878	0.686512	0.773803	0.663762	M4
											0.717565	0.757165	0.797131	0.788845	0.763295	0.821999	0.761903	0.776042	0.750001	M5
												0.685837	0.704174	0.689798	0.712037	0.680479	0.711671	0.675719	0.668729	M6
													0.926963	0.882048	0.95128	0.875228	0.862431	0.937913	0.827429	DO23048
														0.891606	0.941513	0.908581	0.891914	0.930642	0.851456	RK213
															0.954975	0.907344	0.964923	0.939765	0.964533	HK035
																0.942873	0.946287	0.97919	0.91189	HK067
																	0.924841	0.958962	0.876764	HK084
																		0.949385	0.960726	HK090
																			0.910496	HK113
Average correlations
Within HepG2												0.973762
Within HepaRG												0.984091
Within HepG2 and HepaRG												0.94441
Within AFB1-only mice												0.89006
Within AFB1+HBsAg mice												0.744424
Within WGS HCC												0.920427
Within all AFB1 experimental data												0.869639
Between all AFB1 experimental data and WGS HCCs												0.779491

## Sheet: Supplemental_Table_S3
Supplemental Table S3 Mutation statistics on AFB1-exposed cell lines, liver tumors from AFB1-exposed mice, and human HCC with likely aflatoxin exposure.
			Counts
Sample	G > N /Mb	G > T /Mb	G > N	G > T	GN|NG > NN	GG > TT	GN>TN|NG>NT	NN>NN	(GN | NG) > NN / G > N	GG>TT / G>T	G > T / G > N
Human cell lines exposed to AFB1
HepaRG-1	4.96169	3.49224	7550	5314	57	7	39	63	0.00754967	0.00131728	0.703841
HepaRG-2	5.24297	3.63157	7978	5526	65	11	46	68	0.00814741	0.00199059	0.692655
HepaRG-3	2.07603	1.38402	3159	2106	18	1	13	22	0.00569801	0.000474834	0.666667
Avg HepaRG											0.679661
HepG2-1	2.63397	1.61534	4008	2458	44	3	34	50	0.010978	0.0012205	0.613273
HepG2-2	3.05916	1.88479	4655	2868	30	5	22	33	0.00644468	0.00174338	0.616112
HepG2-3	1.93013	1.12246	2937	1708	26	3	15	34	0.00885257	0.00175644	0.581546
Avg HepG2											0.598829
Tumors from mice exposed to AFB1
M1	2.18126	1.5664	3246	2331	25	6	18	26	0.00770179	0.002574	0.718115
M2	1.62015	1.11213	2411	1655	16	4	15	16	0.00663625	0.00241692	0.686437
M3	2.73363	2.04283	4068	3040	50	14	44	51	0.0122911	0.00460526	0.747296
Avg M1,M2, M3			3241.67						0.00887636		0.717283
Tumors from HBsAg mice exposed to AFB1
M4	0.406551	0.247962	605	369	3	0	2	3	0.00495868	0	0.609917
M5	0.275514	0.151868	410	226	2	1	2	2	0.00487805	0.00442478	0.55122
M6	0.26073	0.130365	388	194	4	1	4	4	0.0103093	0.00515464	0.5
Avg M4,M5,M6			467.667						0.00671533		0.553712
Avg all mouse tumors									0.00779585
HCCs from Qidong
PT1	2.51752	1.59196	136	86	2	2	2	2	0.0147059	0.0232558	0.632353
PT2	1.27727	0.79598	69	43	0	0	0	0	0	0	0.623188
PT3	4.68333	3.05434	253	165	1	1	1	1	0.00395257	0.00606061	0.652174
PT4	2.29538	1.40685	124	76	1	0	1	1	0.00806452	0	0.612903
PT5	3.6467	2.3139	197	125	0	0	0	0	0	0	0.634518
PT6	4.55375	3.03583	246	164	0	0	0	0	0	0	0.666667
Whole-genome-data from HCCs from Sung et al., 2012, TCGA, and Fujimoto et al., 2016
DO23048	1.58248	0.900334	2408	1370	29	8	23	32	0.0120432	0.00583942	0.568937
RK213	0.585546	0.354876	891	540	18	13			0.020202	0.0240741	0.606061
HK035	1.66397	0.884562	2532	1346	26	15	24	27	0.0102686	0.0111441	0.531596
HK067	2.8745	1.69683	4374	2582	46	9	38	53	0.0105167	0.00348567	0.590306
HK084	10.2112	6.94703	15538	10571	292	175	279	307	0.0187926	0.0165547	0.680332
HK090	4.65019	2.55051	7076	3881	101	42	90	105	0.0142736	0.010822	0.548474
HK113	2.07077	1.24732	3151	1898	35	16	28	37	0.0111076	0.00842993	0.602348
HK203	2.47559	1.27624	3767	1942	63	33	55	67	0.0167242	0.0169928	0.51553
Avg WGS HCCs											0.580448
Whole exome data from HCCs from recent African immigrants reported in Schulze et al., 2015 as likely reflecting aflatoxin exposure
CHC1154	3.72956	2.09406	244	137	1	0	1	1	0.00409836	0	0.561475
CHC1211	3.14873	2.06349	206	135	0	0	0	0	0	0	0.65534
CHC1704	7.70368	5.18164	504	339	2	0	2	2	0.00396825	0	0.672619
CHC1717	2.3539	1.29923	154	85	1	1	1	1	0.00649351	0.0117647	0.551948
CHC1754	4.37153	2.98059	286	195	2	0	2	2	0.00699301	0	0.681818
Whole exome data from TCGA reported in Schulze et al., 2015 as likely reflecting aflatoxin exposure
CCA5UE	1.62022	0.840679	106	55	1	1	1	1	0.00943396	0.0181818	0.518868
CCA7IG	1.57436	0.794824	103	52	1	0	1	1	0.00970874	0	0.504854
CCA7II	2.24691	1.29923	147	85	2	1	2	2	0.0136054	0.0117647	0.578231
CCA7IL	1.19224	0.519693	78	34	1	0	1	1	0.0128205	0	0.435897
DDA114	1.40623	0.825394	92	54	0	0	0	0	0	0	0.586957

## Sheet: Supplemental_Table_S4
Supplemental Table S4 Statistical tests of transcriptional strand bias by expression quartile from 1 = lowest to 4 = highest. C > A and G > T counts are with reference to the sense (i.e. non-transcribed) strand, so G > T mutations would be the consequence of guanine adducts on the non-transcribed strand. P values by binomial test against the null hypothesis that C > A counts are 1/2 of the combin…
	Expression quartile	Mutation count
SampleID		C > A	G > T	p	q
Human cell lines
HepaRG-1	1	76	98	0.0555602	0.0941256
	2	80	119	0.00345764	0.0081623
	3	36	123	1.25044e-12	1.00035e-11
	4	22	119	1.32723e-17	2.12357e-16
HepaRG-2	1	104	137	0.0195265	0.0369975
	2	79	164	2.62253e-08	1.51058e-07
	3	33	158	4.60831e-21	8.29496e-20
	4	25	125	1.70529e-17	2.45561e-16
HepaRG-3	1	54	45	0.84256	0.854427
	2	31	66	0.000245079	0.000720232
	3	8	51	4.5262e-09	2.71572e-08
	4	6	48	1.62827e-09	1.06577e-08
HepG2-1	1	139	136	0.595277	0.664495
	2	89	156	1.11112e-05	4.21055e-05
	3	21	104	1.0479e-14	1.07784e-13
	4	7	121	2.94535e-28	1.06033e-26
HepG2-2	1	30	24	0.829555	0.847205
	2	16	19	0.367939	0.441527
	3	2	14	0.00209045	0.00510213
	4	3	28	2.32458e-06	1.04606e-05
HepG2-3	1	41	37	0.714207	0.745259
	2	24	37	0.0618657	0.102273
	3	5	26	9.60976e-05	0.000314501
	4	7	31	5.80835e-05	0.000199143
Mouse liver tumors
M1	1	66	107	0.00113109	0.00296139
	2	34	109	1.16525e-10	7.9903e-10
	3	5	92	4.29538e-22	8.83622e-21
	4	11	117	7.8784e-24	1.89082e-22
M2	1	42	76	0.00112133	0.00296139
	2	17	53	9.59985e-06	3.73616e-05
	3	4	58	1.29588e-13	1.16629e-12
	4	7	60	6.64018e-12	4.78093e-11
M3	1	92	124	0.0173386	0.0346773
	2	48	108	8.74013e-07	4.19526e-06
	3	8	111	1.26979e-24	3.65701e-23
	4	3	113	3.13261e-30	1.50365e-28
M4	1	11	15	0.278599	0.364711
	2	7	14	0.0946236	0.144955
	3	3	11	0.0286865	0.0529597
	4	5	12	0.0717316	0.11606
M5	1	5	10	0.150879	0.21946
	2	5	5	0.623047	0.679688
	3	3	7	0.171875	0.242647
	4	0	10	0.000976562	0.0026533
M6	1	5	9	0.211975	0.294576
	2	5	13	0.0481262	0.0825021
	3	1	7	0.0351562	0.0617378
	4	3	3	0.65625	0.694853
Human WES HCCs from Qidong, China
PT1	1	13	16	0.355536	0.430228
	2	4	10	0.0897827	0.140265
	3	1	12	0.00170898	0.00431743
	4	3	14	0.00636292	0.0145438
PT2	1	7	5	0.806152	0.829185
	2	2	4	0.34375	0.423077
	3	1	5	0.109375	0.164062
	4	2	10	0.0192871	0.0369975
PT3	1	17	23	0.214795	0.294576
	2	8	23	0.00533692	0.0123954
	3	3	26	7.61822e-06	3.04729e-05
	4	1	23	1.49012e-06	6.92183e-06
PT4	1	12	17	0.229129	0.308361
	2	4	7	0.274414	0.362529
	3	0	13	0.00012207	0.000382133
	4	0	9	0.00195312	0.00484914
PT5	1	15	14	0.644464	0.687429
	2	4	11	0.0592346	0.0991835
	3	1	19	2.00272e-05	7.39464e-05
	4	0	23	1.19209e-07	6.35783e-07
PT6	1	24	23	0.614567	0.675554
	2	16	14	0.707668	0.743826
	3	3	17	0.00128841	0.00331306
	4	1	18	3.8147e-05	0.000137329
Human WGS HCCs
DO23048	1	90	80	0.800536	0.829185
	2	51	73	0.0294379	0.053659
	3	21	56	4.10796e-05	0.00014428
	4	12	60	4.02775e-09	2.52172e-08
RK213	1	19	23	0.321984	0.403181
	2	12	19	0.140521	0.208608
	3	12	17	0.229129	0.308361
	4	1	13	0.000915527	0.00253531
HK035	1	75	89	0.155019	0.223228
	2	51	79	0.00877085	0.0194308
	3	16	53	4.54753e-06	1.92601e-05
	4	22	51	0.000457137	0.00131656
HK067	1	162	165	0.455978	0.538203
	2	74	148	3.83666e-07	1.9051e-06
	3	40	101	1.43749e-07	7.39281e-07
	4	32	119	2.79576e-13	2.36817e-12
HK084	1	591	669	0.0150125	0.0308828
	2	322	558	7.97163e-16	1.04356e-14
	3	122	518	2.86143e-59	2.06023e-57
	4	44	536	7.5705e-109	1.09015e-106
HK090	1	215	252	0.0478159	0.0825021
	2	136	160	0.0905879	0.140265
	3	53	152	1.43313e-12	1.08616e-11
	4	45	149	1.65141e-14	1.58535e-13
HK113	1	98	107	0.288222	0.37391
	2	63	113	0.000101095	0.000323504
	3	17	96	7.36376e-15	8.83651e-14
	4	18	98	8.24553e-15	9.13351e-14
HK203	1	118	100	0.900981	0.900981
	2	66	91	0.0275467	0.051516
	3	31	78	3.86696e-06	1.6874e-05
	4	32	79	4.72552e-06	1.94422e-05
Human WES HCCs previously identified as likely aflatoxin-exposed
CHC1154	1	16	16	0.569975	0.646271
	2	13	16	0.355536	0.430228
	3	2	10	0.0192871	0.0369975
	4	0	11	0.000488281	0.00137868
CHC1211	1	19	18	0.628585	0.680574
	2	5	14	0.0317841	0.0572113
	3	4	10	0.0897827	0.140265
	4	1	17	7.24792e-05	0.000242721
CHC1704	1	25	32	0.213521	0.294576
	2	21	40	0.0102074	0.0222706
	3	8	31	0.000147038	0.000441115
	4	6	42	5.04374e-08	2.79346e-07
CHC1717	1	13	13	0.577491	0.649677
	2	8	9	0.5	0.576
	3	1	9	0.0107422	0.0224185
	4	4	5	0.5	0.576
CHC1754	1	20	23	0.380396	0.452702
	2	12	21	0.0813778	0.130205
	3	7	23	0.00261144	0.00626746
	4	1	16	0.000137329	0.000420753
CCA5UE	1	7	10	0.314529	0.3973
	2	7	11	0.240341	0.320455
	3	2	4	0.34375	0.423077
	4	1	9	0.0107422	0.0224185
CCA7IG	1	7	10	0.314529	0.3973
	2	6	11	0.166153	0.236891
	3	1	5	0.109375	0.164062
	4	0	6	0.015625	0.0316901
CCA7II	1	20	20	0.562685	0.643069
	2	7	10	0.314529	0.3973
	3	2	1	0.875	0.881119
	4	2	9	0.0327148	0.0581597
CCA7IL	1	2	10	0.0192871	0.0369975
	2	4	4	0.636719	0.684235
	3	2	3	0.5	0.576
	4	0	4	0.0625	0.102273
DDA114	1	2	12	0.00646973	0.0145569
	2	6	6	0.612793	0.675554
	3	2	6	0.144531	0.212372
	4	1	9	0.0107422	0.0224185

## Sheet: Supplemental_Table_S5
Supplemental Table S5 Consistent enrichment of G > T mutations in late replicating regions in HepG2 and human HCCs, but not in HepaRG, or human WES HCCs. P values by two-sided Fisher's exact test against the null hypothesis that the proportion of mutated bases is the same in early and late replicating regions. For the WES HCC data, there is insufficient statistical power because of the low number…
	Mutations per megabase							G > T		G > C		G > A
	G > T		G > C		G > A			Proportion	p	Proportion	p	Proportion	p
Sample ID	Late	Early	Late	Early	Late	Early		late		late		late
Human cell lines
HepaRG-1	2.78352	3.13204	0.380813	0.611329	0.70698	0.75601		0.470542	0.000963175	0.383829	7.55774e-08	0.483243	0.351722
HepaRG-2	1.84771	1.90327	0.211752	0.421817	0.536212	0.5828		0.492594	0.516739	0.334221	6.55127e-10	0.479183	0.325302
HepaRG-3	0.502058	0.460534	0.090507	0.132455	0.14686	0.169134		0.521569	0.33315	0.405931	0.0419246	0.464756	0.395687
HepG2-1	1.44811	1.13096	0.435458	0.324004	0.669411	0.487025		0.561486	5.76582e-06	0.573377	0.00355574	0.578857	0.000102881
HepG2-2	1.62059	1.18802	0.433751	0.334193	0.729179	0.566498		0.577009	2.921e-09	0.564821	0.00921908	0.562779	0.000997019
HepG2-3	1.12024	0.70099	0.367151	0.260834	0.575488	0.368835		0.6151	7.41031e-13	0.58465	0.0023525	0.609419	1.11591e-06
Human HCCs from Qidong
PT1	1.30896	1.40519	0.14544	0.322022	0.581758	0.731869		0.482272	1	0.311126	0.703917	0.442864	0.807703
PT2	0.581758	0.731869	0.290879	0.204923	0.290879	0.234198		0.442864	0.807703	0.586683	0.652272	0.553974	0.678374
PT3	3.05423	3.30805	0.290879	0.790419	1.4544	1.22954		0.480053	0.817504	0.269009	0.213371	0.541889	0.580343
PT4	1.74528	1.40519	0.581758	0.0878243	0.872638	0.790419		0.553974	0.489482	0.868837	0.0179691	0.524719	0.815455
PT5	2.32703	2.42981	0.436319	0.292748	1.74528	1.17099		0.489197	1	0.598462	0.467526	0.598462	0.262148
PT6	3.19967	3.3666	0.436319	0.380572	1.16352	1.34664		0.487289	0.909154	0.534121	0.741496	0.463524	0.855736
Other human WGS HCCs
D023048	1.20733	0.749897	0.244198	0.185436	0.606226	0.39125		0.616858	4.90188e-14	0.568386	0.041826	0.60776	7.31825e-07
RK213	0.558411	0.266947	0.0887994	0.0550196	0.245906	0.169134		0.676568	1.05154e-13	0.617439	0.0424899	0.592487	0.00625987
HK035	0.906778	0.454421	0.198091	0.146719	0.614765	0.372911		0.666161	3.13066e-19	0.574493	0.0479384	0.622436	2.35391e-08
HK067	1.89211	1.28583	0.399597	0.271022	1.13048	0.698953		0.595389	4.28416e-15	0.595863	0.000352796	0.617941	2.015e-13
HK084	5.79757	3.67205	1.08438	0.558347	2.04239	1.3816		0.612229	2.12115e-57	0.660109	2.08224e-21	0.596493	1.81095e-16
HK090	3.1131	1.41624	0.766748	0.307702	1.90919	0.949597		0.687318	1.01472e-76	0.713619	6.11331e-25	0.667832	1.47083e-39
HK113	0.857255	0.491101	0.189552	0.13653	0.459366	0.315853		0.635778	3.01185e-13	0.581302	0.035043	0.592563	0.000203404
HK203	1.54204	0.923106	0.380813	0.244531	1.14415	0.741746		0.625536	9.25831e-20	0.608965	7.27312e-05	0.606687	1.32627e-11

## Sheet: Supplemental_Table_S6
Supplemental Table S6 Weak but consistent replication strand bias in human cell lines and human WGS HCCs, but not in WES HCCs. P values by two-sided binomial test against the null hypothesis that C > A and G > T mutations were drawn from a population with equal frequencies of each (R function bionm.test). For the WES HCCs, there is inadequate statistical power due to the low numbers of mutations.
Sample ID	Mutation with respect to leading strand		p	G > T / (C > A + G > T)
	C > A	G > T
Human cell lines
HepaRG-1	1789	2012	0.000316037	0.529334
HepaRG-2	1197	1228	0.542396	0.506392
HepaRG-3	285	328	0.089735	0.535073
Total HepaRG	3271	3568
Aggregate HepaRG			0.00035	0.521714
HepG2-1	799	841	0.311335	0.512805
HepG2-2	897	939	0.338641	0.511438
HepG2-3	562	626	0.0675322	0.526936
Total HepG2	2258	2406
Aggregate HepG2			0.032	0.515866
Total human cell lines	5529	5974
Aggregate human cell lines			3.469e-05	0.519343
Human HCCs from Qidong
PT1	36	34	0.904975	0.485714
PT2	18	12	0.361595	0.4
PT3	67	77	0.453372	0.534722
PT4	36	32	0.716301	0.470588
PT5	56	56	1	0.5
PT6	75	81	0.689054	0.519231
Total human HCCs from Qidong	288	292
Aggregate human HCCs from Qidong			0.9	0.503448
Other human WGS HCCs
DO23048	622	627	0.909892	0.502002
RK213	244	295	0.0311722	0.54731
HK035	428	460	0.298201	0.518018
HK067	1012	1042	0.522261	0.507303
HK084	2927	3273	1.17284e-05	0.527903
HK090	1408	1516	0.0478235	0.518468
HK113	402	475	0.014999	0.541619
HK203	758	783	0.540963	0.508112
Total other human WGS HCCs	6935	7549
Aggregate other human WGS HCCs			1.561e-07	0.521196

## Sheet: Supplemental_Table_S7
Supplemental Table S7 Sources of previously reported somatic mutation data from human tumors.
Source	Data Type	Site
(Schulze et al. 2015)	TCGA WGS reads of DO23048	CGHub (https://cghub.ucsc.edu/)
(Schulze et al. 2015)	WES reads from recent African immigrants	European Genome-Phenome Archive (EGAS00001001002)
(Schulze et al. 2015)	TCGA WES reads	National Cancer Institute Genomic Data Commons Data Portal
(Sung et al. 2012)	WGS reads	ftp.ncbi.nlm.nih.gov:/sra/sra-instant/reads/ByStudy/sra/ERP/ERP001/ERP001196/
(Fujimoto et al. 2016)	Somatic variant calls	International Cancer Genome Consortium data portal (https://dcc.icgc.org/)
TCGA	Somatic variant calls downloaded on Nov 11, 2016	sftp://tcgaftps.nci.nih.gov/tcgajamboree/mc3/pancan.merged.v0.2.7.PUBLIC.maf.gz
TCGA	Clinical information downloaded on Apr 15, 2017a	https://portal.gdc.cancer.go
a. For analysis of evidence of AFB1 exposure in North America, we considered HCCs that were definitely treated in North America. To this end, we excluded HCCs obtained from biorepositories from numerator and denominator, as we were unable to determine where they were treated. In particular we excluded the 4 TCGA HCCs reported in (Schulze et al. 2015) as "Asian" (CCA5UE, CCA7IG, CCA7II, CCA7IL), a…
References
Fujimoto A, Furuta M, Totoki Y, Tsunoda T, Kato M, Shiraishi Y, Tanaka H, Taniguchi H, Kawakami Y, Ueno M et al. 2016. Whole-genome mutational landscape and characterization of noncoding and structural mutations in liver cancer. Nat Genet 48: 500-509.
Schulze K, Imbeaud S, Letouze E, Alexandrov LB, Calderaro J, Rebouissou S, Couchy G, Meiller C, Shinde J, Soysouvanh F et al. 2015. Exome sequencing of hepatocellular carcinomas identifies new mutational signatures and potential therapeutic targets. Nat Genet 47: 505-511.
Sung WK, Zheng H, Li S, Chen R, Liu X, Li Y, Lee NP, Lee WH, Ariyaratne PN, Tennakoon C et al. 2012. Genome-wide survey of recurrent HBV integration in hepatocellular carcinoma. Nat Genet 44: 765-769.

## Sheet: Supplemental_Table_S8
Supplemental Table S8 reconstruction accuracy for Figure 6B,C.
Sample ID	Cosine similarity	Pearson correlation	Euclidian distance	Number of G > N mutations	Relative Euclidean distance
HK084	0.98964	0.987434	503.97	15538	0.0324346
HepaRG-2	0.995665	0.994433	161.163	7978	0.0202009
HepaRG-1	0.997638	0.99697	112.825	7550	0.0149437
HK090	0.994392	0.992198	143.377	7075	0.0202653
HepG2-2	0.991581	0.988563	119.885	4655	0.0257541
HK067	0.992001	0.988654	103.969	4374	0.0237699
M3	0.955284	0.942043	259.213	4060	0.0638456
HepG2-1	0.981842	0.975053	149.378	4008	0.0372699
HK203	0.984245	0.977683	125.593	3767	0.0333402
M1	0.980072	0.973942	136.154	3242	0.041997
HepaRG-3	0.989901	0.986982	96.7612	3159	0.0306303
HK113	0.993623	0.991014	67.3951	3151	0.0213885
HepG2-3	0.985861	0.980433	95.5195	2937	0.0325228
HK035	0.98878	0.983958	70.5924	2532	0.0278801
D023048	0.967709	0.954353	115.466	2408	0.047951
M2	0.971156	0.963665	128.251	2394	0.053572
RK213	0.971322	0.960312	41.3448	891	0.0464027
M4	0.958558	0.943869	34.4067	599	0.0574402
CHC1704	0.909959	0.881453	41.1301	465	0.0884517
M5	0.936561	0.910398	27.5868	410	0.0672848
M6	0.894864	0.849886	32.9216	385	0.0855108
CHC1754	0.933149	0.918234	22.4017	263	0.0851776
PT3	0.933511	0.912174	17.6784	234	0.0755489
PT6	0.819641	0.781153	33.6053	230	0.14611
CHC1154	0.932093	0.90476	13.7672	196	0.0702406
CHC1211	0.885172	0.853062	19.4575	186	0.10461
PT5	0.891731	0.862032	18.39	180	0.102167
CHC1717	0.897172	0.860493	11.938	132	0.0904397
CCA7II	0.903348	0.87363	11.5691	125	0.0925527
PT1	0.790592	0.746315	17.8944	113	0.158357
CCA5UE	0.877216	0.832539	9.12536	93	0.0981222
PT4	0.91795	0.889844	7.45698	91	0.0819448
CCA7IG	0.794994	0.726197	11.0085	84	0.131053
DDA114	0.86262	0.817982	8.67423	80	0.108428
PT2	0.753912	0.684772	10.6435	69	0.154253
CCA7IL	0.75359	0.673756	9.77967	67	0.145965

## Sheet: Supplemental_Table_S9
Supplemental Table S9 Effects of COSMIC Signatures 5 and 6 on NMF decomposition
Mutation in trinucleotide context					Proportion of mutations in…
Before	Ref	After	Var		AFB1sig	AFsig2	AFB1sigG>N in presence of COSMIC 5	AFsig2G>N in presence of COSMIC 5	AFB1sigG>N in presence of COSMIC 6	AFsig2G>N in presence of COSMIC 6
T	G	T	T		0.038393	0.0531317	0.0378309	0.0680124	0.0424824	0.0599016
G	G	T	T		0.0137679	0.0329007	0.0160501	0.0370755	0.0192994	0.0333597
C	G	T	T		0.0191341	0.00540687	0.0194427	0.00926675	0.0174812	0.00793863
A	G	T	T		0.0229984	0.0330551	0.0242735	0.03911	0.0261146	0.0353081
T	G	G	T		0.0781596	0.0288172	0.0679217	0.0545398	0.0644519	0.04532
G	G	G	T		0.0476168	0.0367614	0.0436838	0.0578346	0.0439712	0.0453693
C	G	G	T		0.0345242	3.86511e-42	0.0397967	8.69328e-18	0.0330062	8.11795e-54
A	G	G	T		0.0624961	0.0188454	0.054828	0.0380356	0.0504457	0.0312905
T	G	C	T		0.140244	0.025238	0.125501	0.076969	0.116494	0.0611598
G	G	C	T		0.0564173	0.0814479	0.0643464	0.0964708	0.065742	0.0803636
C	G	C	T		0.0617332	0.00181805	0.0578666	0.0104994	0.0490269	0.00844489
A	G	C	T		0.114742	0.0168095	0.10796	0.0490434	0.0970829	0.0398226
T	G	A	T		0.016144	0.068033	0.0215934	0.0722444	0.0286923	0.0650326
G	G	A	T		0.0131125	0.0682996	0.0186105	0.0704512	0.0254475	0.0623533
C	G	A	T		0.00913498	0.00631648	0.00867602	0.00582427	0.00837952	0.00642157
A	G	A	T		0.0361216	0.0450639	0.0374847	0.0440494	0.0383109	0.0441564
T	G	T	C		0.011637	0.00964611	0.0110118	0.0054354	0.0116969	0.00964706
G	G	T	C		0.00264715	0.00639684	0.0023859	0.00262991	0.00347398	0.00556532
C	G	T	C		0.00357114	0.000149215	0.0025711	1.70275e-117	0.00272065	0.000554323
A	G	T	C		8.86936e-08	0.0130523	1.10617e-05	0.00619103	0.00300401	0.0105638
T	G	G	C		0.00764499	0.00731311	0.00745366	0.0044081	0.0078711	0.00711403
G	G	G	C		0.0218109	0.00215241	0.0212406	1.45894e-12	0.0182781	0.00416613
C	G	G	C		0.00528108	0.000222934	0.00476831	4.55495e-135	0.00465219	0.000403047
A	G	G	C		0.00332255	0.010037	0.00372426	0.0045477	0.00507524	0.00832978
T	G	C	C		0.0145908	0.0036563	0.01209	0.007278	0.0120476	0.00782595
G	G	C	C		0.0138782	0.00651669	0.0121625	0.00684755	0.0116053	0.00774597
C	G	C	C		0.00908398	3.55029e-29	0.010227	7.33075e-14	0.00874457	2.45214e-23
A	G	C	C		0.014356	0.00136665	0.0117848	0.00161205	0.0109532	0.00371646
T	G	A	C		0.000347515	0.0169848	0.0028762	0.0141035	0.00398302	0.013361
G	G	A	C		0.00211613	0.0159902	0.00406989	0.00975983	0.00538307	0.0122923
C	G	A	C		0.00132843	0.00145424	0.00148937	0.000441879	0.00144293	0.00104223
A	G	A	C		2.60273e-20	0.0242542	0.00174696	0.0183776	0.00363494	0.0196588
T	G	T	A		0.00838529	0.0259907	0.00997823	0.0121158	0.0120177	0.0194828
G	G	T	A		0.00299397	0.0139324	0.00347802	0.00523835	0.00493231	0.0100264
C	G	T	A		5.00569e-11	0.0138912	2.22808e-127	1.56e-122	3.34144e-38	0.00534858
A	G	T	A		7.50022e-13	0.0207258	0.000119753	0.00894228	0.00356737	0.0150516
T	G	G	A		2.94405e-20	0.0281279	6.64166e-36	0.0143769	0.00402438	0.0235142
G	G	G	A		0.000883223	0.0223145	0.00254231	0.00902262	0.00541583	0.0159744
C	G	G	A		0.00172986	0.00812272	9.62315e-57	2.6004e-145	4.69489e-05	0.00188274
A	G	G	A		2.50031e-21	0.0338028	1.80155e-25	0.0228079	0.00478902	0.029269
T	G	C	A		0.0395377	0.0181233	0.0407548	0.0110515	0.0355772	0.0159641
G	G	C	A		0.0115281	0.0341783	0.0150262	0.0211868	0.014615	0.0238061
C	G	C	A		0.0205762	0.00726934	0.0211794	3.28258e-56	0.0157223	3.67939e-15
A	G	C	A		0.0291952	0.017021	0.0306571	0.00833449	0.0275094	0.0139301
T	G	A	A		0.00331698	0.0381209	0.00769217	0.0320381	0.0108412	0.0320832
G	G	A	A		0.000721143	0.0314771	0.00290259	0.0158851	0.00709727	0.0232323
C	G	A	A		0.00174247	0.00833259	0.00314654	4.76219e-13	0.00195036	0.00352337
A	G	A	A		0.00303463	0.0374317	0.00737697	0.0277123	0.0102636	0.0291317
Comparisons by Pearson correlation coefficients
AFB1sigG>N versus AFB1sigG>N extracted with COSMIC 5									0.994158
AFB1sigG>N versus AFB1sigG>N extracted with COSMIC 6									0.983706
AFsig2G>N versus AFsig2G>N extracted with COSMIC 5									0.856813
AFsig2G>N versus AFsig2G>N extracted with COSMIC 6									0.913387
Comparisons by multinomial p values*
							100 mutations	500 mutations
AFB1sigG>N
In presence of COSMIC 5							1	0.9999
In presence of COSMIC 6							1	0.7671
AFsig2G>N
In presence of COSMIC 5							0.51	<1E-4
In presence of COSMIC 6							0.99	0.0081
* P value that 100 or 500 mutations following the signature in Figure 6 (rounded) were generated from the signature extracted in the presence of COSMIC 5 or COSMIC 6; see Methods.

## Sheet: Supplemental_Table_S10
Supplemental Table S10 Reconstruction accuracy in Figure 6F.
Sample ID	Cosine similarity	Pearson correlation	Euclidian distance	Number of G > N mutations	Relative Euclidean distance
HK084	0.978227	0.958021	731.871	23966	0.0305379
HK177	0.964692	0.918825	432.544	12076	0.0358185
HK169	0.959769	0.926363	506.647	11797	0.0429471
HK090	0.98627	0.9669	236.613	10863	0.0217816
HK268	0.953032	0.887553	360.231	8795	0.0409586
HK106	0.955957	0.894044	331.155	8352	0.0396498
HK067	0.976019	0.939719	228.213	7938	0.0287494
HK203	0.98048	0.944032	176.271	7079	0.0249006
HK079	0.973951	0.926903	143.298	4961	0.028885
HK113	0.982408	0.962651	120.854	4630	0.0261024
HK035	0.98049	0.944003	110.882	4465	0.0248336
RK033	0.958899	0.891539	143.749	3872	0.0371253
HK154	0.97616	0.933266	103.886	3740	0.0277771
HK260	0.970596	0.910421	111.072	3680	0.0301827
D023048	0.958776	0.915006	137.717	3403	0.0404692
RK213	0.962365	0.922484	50.7667	1305	0.0389017
RK206	0.829019	0.595268	41.9415	529	0.0792846

[truncated: 3 more sheets: Supplemental_Table_S11, Supplemental_Table_S12, Supplemental_Table_S13]
